1 **Evolutionary dynamics of the SKN-1 → MED → END-1,3**  
2 **regulatory gene cascade in *Caenorhabditis* endoderm**  
3 **specification**

4 Morris F. Maduro\*

5 Molecular, Cell and Systems Biology Department, University of California, Riverside, Riverside, CA

6

7

8 Keywords: GATA factors, cell fate specification, gene regulatory network, developmental system drift,  
9 *Caenorhabditis*, network evolution

10

11

12

13

14 \*Corresponding author.

15 University of California, Riverside

16 Riverside, CA

17 USA 92521

18 [mmaduro@ucr.edu](mailto:mmaduro@ucr.edu)

19 +01 (951) 827-7196

## 20 ABSTRACT

21 Gene regulatory networks (GRNs) with GATA factors are important in animal development, and  
22 evolution of such networks is an important problem in the field. In the nematode, *Caenorhabditis*  
23 *elegans*, the endoderm (gut) is generated from a single embryonic precursor, E. The gut is specified by  
24 an essential cascade of transcription factors in a GRN, with the maternal factor SKN-1 at the top,  
25 activating expression of the redundant *med-1,2* divergent GATA factor genes, with the combination of  
26 all three contributing to activation of the paralogous *end-3* and *end-1* canonical GATA factor genes. In  
27 turn, these factors activate the GATA factors genes *elt-2* and *elt-7* to regulate intestinal fate. In this  
28 work, genome sequences from over two dozen species within the *Caenorhabditis* genus are used to  
29 identify putative orthologous genes encoding the MED and END-1,3 factors. The predictions are  
30 validated by comparison of gene structure, protein conservation, and putative *cis*-regulatory sites. The  
31 results show that all three factors occur together, but only within the Elegans supergroup of related  
32 species. While all three factors share similar DNA-binding domains, the MED factors are the most  
33 diverse as a group and exhibit unexpectedly high gene amplifications, while the END-1 orthologs are  
34 highly conserved and share additional extended regions of conservation not found in the other GATA  
35 factors. The MEME algorithm identified both known and previously unrecognized *cis*-regulatory motifs.  
36 The results suggest that all three genes originated at the base of the Elegans supergroup and became  
37 fixed as an essential embryonic gene regulatory network with several conserved features, although each  
38 of the three factors is under different evolutionary constraints. Based on the results, a model for the  
39 origin and evolution of the network is proposed. The set of identified MED, END-3 and END-1 factors  
40 form a robust set of factors defining an essential embryonic gene network that has been conserved for  
41 tens of millions of years, that will serve as a basis for future studies of GRN evolution.

42

## 43 INTRODUCTION

44 Central to the development of a metazoan is the activation of tissue-specific gene regulatory networks  
45 (GRNs) that drive subdivision of progenitors and emergence of features of terminal differentiation  
46 (DAVIDSON 2010). On evolutionary time scales, changes in such networks drive appearance of novel  
47 features, but these changes can also occur without changes in morphology or development (PETER and  
48 DAVIDSON 2016). Such differences in GRNs that nonetheless drive homologous developmental processes  
49 exemplify Developmental System Drift (DSD) (TRUE and HAAG 2001). In the nematode genus  
50 *Caenorhabditis*, which includes the well-studied species *C. elegans*, examples of DSD include the gene  
51 networks that produce the derived character of hermaphroditism, which evolved at least three  
52 independent times in the genus, and vulval development (ELLIS and LIN 2014; FELIX 2007; HAAG *et al.*  
53 2018).

54 A relatively understudied area in *Caenorhabditis* is the evolutionary dynamics of GRNs that drive  
55 embryonic development. One reason may be that the close relatives to *C. elegans* exhibit  
56 indistinguishable embryogenesis, differing perhaps by the timing of some developmental milestones  
57 (LEVIN *et al.* 2012; MEMAR *et al.* 2019; ZHAO *et al.* 2008). Another reason for the paucity of evo-devo  
58 studies in embryogenesis is that the dissection of a GRN requires cause-and-effect associations to be  
59 probed through experimental perturbations (DAVIDSON *et al.* 2002). The powerful tools of forward and  
60 reverse genetics in *C. elegans* have only recently become available in related species, most notably *C.*  
61 *briggsae*, which like *C. elegans* is hermaphroditic and supports RNA-mediated interference (ZHAO *et al.*  
62 2010). A third, and more important limitation, is that very few embryonic GRNs are known at high  
63 resolution in *C. elegans* that could serve as a comparison.

64 The specification of the *C. elegans* endoderm is an example of a set of interacting transcription factors  
65 that has been studied in great detail (MADURO 2017). In the early embryo, the founder cells E and MS are  
66 born (Fig. 1A). The E cell generates the entire endoderm (intestine), while its sister cell MS generates  
67 many mesodermal cell types, including the part of the pharynx, and many body muscle cells (SULSTON *et al.*  
68 1983). Many components of the GRN underlying MS and E development are known with high  
69 precision, and in most of cases, regulatory inputs have been confirmed to be direct and *cis*-regulatory  
70 sites have even been identified in upstream regions (BROITMAN-MADURO *et al.* 2006; BROITMAN-MADURO *et al.*  
71 2005; DU *et al.* 2016; MADURO *et al.* 2001; WIESENFAHRT *et al.* 2015). This network is therefore a highly  
72 suitable system in which to examine questions of GRN evolution and developmental system drift.

73 The endomesoderm specification network works as follows. A simplified diagram is shown in Fig. 1B.  
74 Specification of both MS and E begins with accumulation of maternal SKN-1 protein. SKN-1 is an unusual  
75 transcription factor that binds DNA as a monomer through a Skn domain consisting of a homeodomain-  
76 like amino half recognizing an A/T-rich sequence, and a bZIP-like carboxyl basic domain recognizing a  
77 TCAT sequence (BLACKWELL *et al.* 1994; CARROLL *et al.* 1997; LO *et al.* 1998; PAL *et al.* 1997). SKN-1 directly  
78 activates expression of *med-1* and *med-2*, which encode nearly identical divergent GATA-type  
79 transcription factors that recognize an atypical AGTATAC core site (BROITMAN-MADURO *et al.* 2005; LOWRY  
80 *et al.* 2009). SKN-1 and MED-1,2 are important for specification of both MS and E, as loss of activity of  
81 these genes results in a penetrant failure to specify MS, and an incompletely penetrant failure to specify

82 E (BOWERMAN *et al.* 1992; MADURO *et al.* 2001). In MS, the MEDs specify mesodermal fate in part through  
83 activation of *tbx-35* (BROITMAN-MADURO *et al.* 2006). In E, SKN-1 and MED-1,2 contribute to activation of  
84 the paralogous *end-1* and *end-3* genes. These encode similar GATA factors that are expressed in the  
85 early E lineage, with *end-3* being activated slightly earlier than *end-1* (BAUGH *et al.* 2003; MADURO *et al.*  
86 2005a; MADURO *et al.* 2002; ZHU *et al.* 1997). In turn, the END-3 and END-1 proteins activate *elt-2*, a  
87 GATA factor that sets and maintains, through positive autoregulation, the fate of intestinal cells and is  
88 the central regulator for all intestinal genes (FUKUSHIGE *et al.* 1998; FUKUSHIGE *et al.* 1999; MCGHEE *et al.*  
89 2009). The *elt-7* gene encodes a similar GATA factor that shares function with *elt-2*, but which itself is  
90 not essential for normal development (DINEEN *et al.* 2018; SOMMERMANN *et al.* 2010). All of END-1, END-3,  
91 ELT-2 and ELT-7 seem to have similar DNA-binding properties and interact with canonical GATA binding  
92 sites of the type HGATAR (DU *et al.* 2016; WIESENFART *et al.* 2015). Many additional studies have  
93 revealed unexpected nuance and complexity to the myriad of factors in this network, confirming that  
94 the sum of upstream inputs into *elt-2* activation is not merely additive. Upstream factors have  
95 distinguishable roles in establishment of robust cell divisions, gut morphogenesis and activation of genes  
96 important for metabolic function of the intestine (BOECK *et al.* 2011; CHOI *et al.* 2017; DINEEN *et al.* 2018;  
97 MADURO *et al.* 2015; SAWYER *et al.* 2011).

98 Integrated with the SKN-1 → MED-1,2 → END-1,3 feed-forward regulatory chain is the Wnt/β-catenin  
99 asymmetry pathway, which acts in the asymmetric MS vs. E fate decision through the nuclear effector  
100 TCF/POP-1 (LIN *et al.* 1995; MADURO *et al.* 2002; OWRAGHI *et al.* 2010; ROCHELEAU *et al.* 1997; SHETTY *et al.*  
101 2005; THORPE *et al.* 1997). In MS, POP-1 represses gut fate by preventing activation of *end-1* and *end-3*,  
102 while in E, POP-1 is an activator that contributes to activation of *end-1* through its association with a  
103 divergent β-catenin, SYS-1 (MADURO *et al.* 2005b; SHETTY *et al.* 2005). The POP-1 contribution to gut  
104 specification is not the major regulatory input, however, because loss of *pop-1* still results in endoderm  
105 specification from E (LIN *et al.* 1995). The contribution of POP-1 is detectable when depletion of *pop-1* is  
106 combined with loss of *skn-1*, *med-1,2* (together) or *end-3*, which produces loss of gut specification in a  
107 majority of embryos (MADURO *et al.* 2005a; MADURO *et al.* 2015; MADURO *et al.* 2007; MADURO *et al.*  
108 2005b; OWRAGHI *et al.* 2010; SHETTY *et al.* 2005). An additional minor input into gut specification in *C.*  
109 *elegans* is through maternally provided PAL-1 protein, a Caudal-like factor whose primary role is  
110 specification of a different blastomere called C (HUNTER and KENYON 1996; MADURO *et al.* 2005b).

111 A small number of studies have investigated the evolutionary dynamics of gut specification in species  
112 closely related to *C. elegans*. In *C. briggsae*, the *end-1* and *end-3* orthologues (the latter of which is  
113 found as two nearby paralogues, *end-3.1* and *end-3.2*) are expressed in the early E lineage, and  
114 knockdown of both by RNAi results in a failure to specify gut (LIN *et al.* 2009; MADURO *et al.* 2005a). In *C.*  
115 *briggsae* and *C. remanei*, most orthologues of the *med* genes, when introduced individually as  
116 transgenes, can fully complement the embryonic lethality of *C. elegans med-1,2(-)* embryos (COROIAN *et al.*  
117 2005). Together these studies suggested that the *med* and *end* factors play similar roles in all three  
118 species, as might be expected. Somewhat unexpectedly, however, knockdown of *skn-1* and *pop-1*  
119 orthologues in *C. briggsae* was found to produce different phenotypes from *C. elegans*, suggesting that  
120 the way that SKN-1 and POP-1 interact with their downstream target genes is subject to evolutionary  
121 changes even among very closely related species, i.e. the hallmark of developmental system drift (LIN *et*

122 *al.* 2009; ZHAO *et al.* 2010). From these few studies, then, a model emerges of a core endoderm  
123 specification pathway, where some regulatory inputs into the pathway are subject to more rapid  
124 evolutionary change than others.

125 An important way that properties of a GRN can be studied on an evolutionary scale is to examine  
126 features of orthologous genes in related species (PETER and DAVIDSON 2016). However, given the  
127 essential requirement for the gut specification network in *C. elegans*, a paradox became apparent when  
128 genome sequences outside of the genus were completed: No *med* or *end* orthologues could be  
129 identified in the related nematode *Pristionchus pacificus*, while putative orthologues of *elt-2* and *skn-1*  
130 can be found in *Pristionchus* and in even more divergent species (data not shown) (COUTHIER *et al.* 2004;  
131 DIETERICH *et al.* 2008; SCHIFFER *et al.* 2014). In recent years, however, the number of known species within  
132 the *Caenorhabditis* genus has grown considerably, opening possibilities for studying evolution of  
133 development through sequence comparisons (KIONTKE *et al.* 2011). In the past two years, new sequence  
134 assemblies have become available for over two dozen *Caenorhabditis* genomes both within and outside  
135 of the so-called "Elegans supergroup" of species that are most closely related to *C. elegans* (FELIX *et al.*  
136 2014; STEVENS *et al.* 2019). Collectively, this powerful set of sequences captures tens of millions of years  
137 of genome evolution (CUTTER 2008; STEIN *et al.* 2003).

138 In this work, I have taken a purely *in silico* approach and performed searches of *Caenorhabditis* genome  
139 sequence assemblies to identify orthologues of the *med*, *end-3* and *end-1* factors (HAAG and THOMAS  
140 2015). Patterns of conservation of gene structure, protein structure and putative *cis*-regulatory sites are  
141 revealed in the *med* and *end* genes that confirm known information from *C. elegans* and reveal new  
142 insights into the MED and END proteins and the evolutionary dynamics of the network. The results  
143 complement studies that identify genome-wide conserved putative *cis*-regulatory motifs among close  
144 relatives of *C. elegans* (GRISHKEVICH *et al.* 2011; SIEPEL *et al.* 2005; ZHAO *et al.* 2012). A surprising finding is  
145 that the endoderm network likely originated at the base of the Elegans supergroup, in a manner that  
146 can be hypothesized to have resulted from the rapid serial intercalation of successive duplications of an  
147 ancestral GATA factor, likely *elt-2*. Other unexpected findings are the MED, END-3 and END-1 proteins  
148 are evolving at different rates, and that END-1 contains previously unrecognized, highly conserved  
149 domains that distinguish it from END-3. The resulting suite of MED/END-3/END-1 factors from 20 species  
150 forms a starting point for future studies on GRN evolution in *Caenorhabditis*.

151

## 152 **Materials and Methods**

153

### 154 **IDENTIFICATION OF PUTATIVE MED AND END ORTHOLOGS**

155 Sequence scaffolds and predicted proteins were downloaded from the *Caenorhabditis* Genomes Project  
156 (CGP) website (<http://download.caenorhabditis.org>) in late 2017. Searches were performed using the  
157 NCBI Windows 64-bit BLAST 2.7.1+ executable (<ftp://ftp.ncbi.nlm.nih.gov/blast/executables/LATEST/>) on  
158 a 64-bit Core i7 PC running Microsoft Windows 10, complemented by searching on both the CGP site  
159 and WormBase (<http://wormbase.org>). FASTA files containing sequence scaffolds, and others containing

160 protein predictions, were searched by TBLASTN and BLASTP respectively using the protein sequences of  
161 *C. elegans* MED-1, END-1 and END-3. The updated *C. elegans* VC2010 sequence was also searched to  
162 confirm the *med* and *end* genes (YOSHIMURA *et al.* 2019).

163 Putative orthologous genes were identified using recommended best practices (HAAG and THOMAS 2015).  
164 Genes were first predicted by matching high-scoring segment pairs from TBLASTN results with genomic  
165 sequence, predicting the gene structure by identifying consensus intron splice donor and acceptor  
166 sequences, and comparing with the predicted genes from the assembly projects (SPIETH *et al.* 2014;  
167 STEVENS *et al.* 2019). Identification of gene structure started with the coding region for the DNA-binding  
168 domains and progressed both upstream and downstream. As analysis progressed, conserved features of  
169 the *med* and *end* genes and their gene products, within and among closely related species, became  
170 apparent, and these were used to refine the gene predictions. Searching of representative orthologs  
171 from each species back to the *C. elegans* genome confirmed that the predictions were the best matches.  
172 In some cases, the gene predictions from the assembly projects included short (<50 bp) predicted  
173 introns that could also be read through as coding. For these, a case-by-case judgment was made as to  
174 whether to include such introns in favor of maximizing amino-acid level homology. Some of the  
175 predictions within less-conserved regions could be incorrect, but these would not be expected to  
176 dramatically affect the analysis presented here. Similar judgments were made when multiple in-frame  
177 start codons were possible at the 5' end of a gene, or when open reading frames could be extended in  
178 the 3' direction by splicing around a stop codon. While no molecular validation of predicted genes was  
179 made, the manual curation of gene predictions favoring maximal similarity of gene and protein  
180 structures provides a surrogate validation by conservation across related species. This is the approach  
181 taken computationally for gene predictions by algorithms such as TWINSKAN (KORF *et al.* 2001).

182 It is highly likely that the gene set described here includes false duplicates. The quality and coverage of  
183 the genome assemblies, as well as the maintenance of heterozygosity in sequenced strains, are known  
184 to produce artifactual paralogues that are really alleles of one locus (BARRIERE *et al.* 2009; HAAG and  
185 THOMAS 2015). Some of these may still have been included as orthologues because they corresponded to  
186 a predicted gene from the sequence assembly. For example, the two *end-1* genes in *C. brenneri* are  
187 nearly identical with one found on a small sequence scaffold, suggesting that there is only one *end-1*  
188 orthologue in this species. The occurrence of these false duplicates is not expected to affect inter-  
189 species comparisons, for which a representative single gene/protein was chosen. Within a single  
190 species, a false duplicate would appear as a pair of nearly identical proteins. Gene models categorized as  
191 pseudogenes were more straightforward to find because they were truncated, had in-frame stop codons  
192 or frame shifts in the DNA-binding domain, or were missing essential amino acids such as one of the four  
193 cysteines in the C4 zinc finger. These may be expressed genes but were deemed unlikely to result in a  
194 functional protein.

195 Comparison of the protein predictions to the gene predictions of the various sequence projects  
196 validated the approach used to identify *med* and *end* orthologues. Of the genes identified and deemed  
197 not to be pseudogenes, 94/174 (54%) were identical to a predicted CDS from the assemblies, 56/174  
198 (32%) partially overlapped an existing CDS, and 24/174 (14%) did not correspond to a predicted CDS.  
199 Differences from assembly project predictions often resulted from missing carboxyl and/or amino ends

200 because of large introns, or extensions of open reading frames that maximized ORF length only.  
201 Completely missed predictions tended to be of the small intronless *med* genes that are often missed by  
202 gene-finding algorithms. Reliance of cDNA sequence data were not found to be useful, likely because  
203 the transient expression of the *med* and *end* factors in the earliest stages of embryogenesis meant that  
204 *med* and *end* RNAs were generally absent from mixed-stage cDNA preparations.

205 Predicted genes/proteins have been provisionally named *med-1.n*/MED-1.n, *end-3.n*/END-3.n, and *end-*  
206 *1.n*/END-1.n (where n = 1, 2, 3, etc.). Lower numbers correspond roughly to the rank order of identified  
207 high-scoring segment pairs from the TBLASTN search, which favors both stronger similarity with the *C.*  
208 *elegans* search sequence and scaffolds that contain multiple hits. Where a single orthologue was found  
209 in a species, it was named as *med-1*/MED-1, *end-1*/END-1 or *end-3*/END-3. For analyses where a single  
210 representative of a set of paralogues was used, it was the first numbered one, except for pseudogenes  
211 or one of the apparent two-fingered MEDs, in which case the next paralogue was used.

## 212 IDENTIFICATION OF CONSERVED REGULATORY MOTIFS

213 A representative set of promoters, one per *Elegans* supergroup species per factor, was compiled to  
214 identify putative *cis*-regulatory motifs. This was done to reduce artifacts arising from overrepresentation  
215 of sets of very similar promoters resulting from intraspecific paralogs, which tended to have very similar  
216 promoters (data not shown). To identify sites starting with known binding sites, a JavaScript program  
217 was written to count occurrence of sites and compute p-values assuming a Poisson distribution, after  
218 the approach used in a prior work (MADURO *et al.* 2015). To identify motifs *ab initio* by their  
219 conservation, MEME (<http://meme-suite.org/tools/meme>) was used with expected site distribution with  
220 any number of repetitions (anr), the number of motifs to be identified as 10, and a maximum motif  
221 width of 12. Alternative parameters generally retrieved the same highly represented sites, except that  
222 motifs with higher E-values (and hence less conserved) could be different. Searches of the *end-1* and  
223 *end-3* promoters as separate groups produced qualitatively similar results as those that used both  
224 together, except that MED-like sites became rare enough among the *end-1* genes that they were not  
225 reported as significant by MEME. I did not consider sites whose E-values were greater than 1e-02 as  
226 these occurred among a small number of *med* and/or *end* genes. Some of these may represent less-  
227 conserved regulatory motifs, although they were not recognized as belonging to known factors from *C.*  
228 *elegans*. The site locations and promoter sequences are in Supplemental File S1.

229

## 230 PHYLOGENETIC ANALYSIS

231 Alignments and simple Maximum-Likelihood trees were performed using MUSCLE as implemented in  
232 MEGA-X (EDGAR 2004; KUMAR *et al.* 2018). The tree for the DNA-binding domains was produced using  
233 RAxML as implemented in the RAxML-NG web service (<https://raxml-ng.vital-it.ch>) with default  
234 parameters, except that the BLOSUM62 substitution matrix was used and bootstrapping was activated  
235 (KOZLOV *et al.* 2019; STAMATAKIS 2014). I note that construction of trees using the proteins described here  
236 results in disagreements with the more robust trees of Stevens *et al.* (2019), with only closely related  
237 species retaining the same relationship, such as the interfertile species *C. briggsae* and *C. nigoni*  
238 (WOODRUFF *et al.* 2010). This is what would be expected from rapidly evolving genes. Consistent with  
239 this, calculations of synonymous and non-synonymous substitutions rates did not produce interpretable

240 information because of the high rates of molecular evolution in *Caenorhabditis* in general (CUTTER 2008).  
241 Moreover, the fastest rates of evolution in *Caenorhabditis* occur in early zygotic regulators with  
242 transient expression, which accurately describes the MED and END factors (CUTTER *et al.* 2019). Because  
243 fast-evolving proteins are being compared among 20 species (as opposed to only two or three), the  
244 major conclusions regarding conserved amino acids and stringency of selection are nonetheless self-  
245 evident from the alignments and shape of phylogenetic trees.

246

#### 247 **ADDITIONAL SOFTWARE**

248 Gene modeling, sequence alignments and other analyses were performed with Vector NTI 6 and the  
249 MEGA-X software package (KUMAR *et al.* 2018). Generation of tables and drawing of to-scale diagrams in  
250 SVG format were aided by custom programs written by the author in JavaScript and Python. These  
251 scripts are available by request. Protein alignments were annotated using BoxShade  
252 ([https://embnet.vital-it.ch/software/BOX\\_form.html](https://embnet.vital-it.ch/software/BOX_form.html)) to generate EPS-formatted files. Data were  
253 compiled in Microsoft Excel and figures were assembled in Adobe Illustrator.

254

#### 255 **DATA AVAILABILITY**

256 Sequences identified in this work are available as Supplemental Files through **figshare** under  
257 "Maduro,2019-SupplementalFiles."

258

## 259 **Results**

### 260 **MED, END-3 AND END-1 ARE FOUND TOGETHER IN THE ELEGANS SUPERGROUP SPECIES**

261 I searched sequence scaffolds from 27 species of the *Caenorhabditis* Genomes Project  
262 (<http://caenorhabditis.org>) with TBLASTN using the protein sequences of *C. elegans* MED-1, END-3 and  
263 END-1. *C. elegans*, *C. briggsae* and *C. remanei* were included as their sequences have been updated  
264 since earlier reports on *med* and *end* genes from these (COROIAN *et al.* 2005; MADURO *et al.* 2005a;  
265 YOSHIMURA *et al.* 2019). As shown in Fig. 2, at least one orthologue of each of the three genes was found  
266 in 20 species comprising the Elegans supergroup, a clade that includes the Japonica and Elegans groups  
267 (KIONTKE *et al.* 2011; STEVENS *et al.* 2019). Consistent with the absence of even more distant MED or END  
268 orthologues, the number of putative GATA factors in the genomes of species outside the Elegans  
269 supergroup was smaller, typically 5 or fewer, and putative orthologues were better matched to other *C.*  
270 *elegans* GATA factors like ELT-3 (data not shown). Across the 20 species searched in the Elegans  
271 supergroup, *end-1* orthologs were unique in each genome except for *C. brenneri* (which has two *end-1*  
272 genes), while multiple paralogs within a species was the norm for the *end-3* orthologs with an average of  
273 2.0 times per genome, and the *med* orthologues, found an average of 5.6 times. Of 208 genes identified,  
274 34 were deemed to be the result of unresolved heterozygosity or were likely pseudogenes (counted  
275 together under "pseudo" in Fig. 2); these were eliminated from further study. It is still likely that some  
276 false duplicates persist in the predicted gene set, so occurrence of nearly identical paralogues should be  
277 interpreted with caution (see **Materials and Methods**). In any event, the identification of false



278 duplicates would not change the results of inter-species comparisons, for which a single representative  
279 gene was chosen for each factor.

### 280 **CONSERVED LINKAGE OF *end-1* and *end-3* ORTHOLOGUES**

281 In *C. elegans* and *C. briggsae* the *end-1* and *end-3* genes are within ~30 kbp of each other (MADURO *et al.*  
282 2005a). Microsynteny of this type has been observed in other genes of these two species (COGLAN and  
283 WOLFE 2002; KENT and ZAHLER 2000). To see if microsynteny of *end-1* and *end-3* is common, I examined  
284 whether *end-1* and *end-3* orthologues in other species may be linked. As shown in Fig. 3A, in 12/18 of  
285 the remaining Elegans supergroup species, *end-1* and *end-3* are found on the same scaffold with an  
286 average separation of ~37 kbp and a range of 20-63 kbp. In *C. brenneri*, which has two *end-1* and five  
287 *end-3* orthologues, one scaffold carries both an *end-1* and an *end-3*, however the distance between  
288 them is ~530 kbp. In the remaining five species, the *end-1* and *end-3* genes are found on different  
289 scaffolds. Because it is possible for a sequence scaffold to break between two linked genes, there may  
290 be additional synteny among these. For example, in *C. sinica* the scaffold containing the *end-1*  
291 orthologue is 32 kbp in size with the *end-1* gene located 3 kbp from one end, raising the possibility that  
292 although its *end-3* ortholog is on a different scaffold, *end-1* and *end-3* may be nearby in the genome.  
293 Closely related species have similar patterns of *end-1* and *end-3* synteny, for example between *C. afro*  
294 and *C. sulstoni*, and between *C. zanzibari* and *C. tribulationis* (Fig. 3A). Although synteny is conserved,  
295 the relative orientation of linked *end-1* and *end-3* paralogues varies, with examples of all four possible  
296 linked arrangements. In *C. elegans*, *end-1* and *end-3* are encoded on the same strand with *end-1*  
297 upstream of *end-3*. In *C. sulstoni*, two *end-3* paralogs are upstream of *end-1* with all three genes on the  
298 same strand. In *C. zanzibari* and *C. tribulationis*, *end-1* is on one strand in between two *end-3* paralogs  
299 on the other strand, hence in one *end-1/3* pair the genes point towards each other, and in the other  
300 they are divergently transcribed. These differing arrangements are consistent with the high rate of  
301 intrachromosomal rearrangements previously noted for *Caenorhabditis* (COGLAN and WOLFE 2002).

### 302 **PREVALENCE OF LINKED *med* AND *end-3* DUPLICATIONS**

303 In *C. briggsae*, two *end-3* paralogues are found in an inverted orientation within several kbp, and in *C.*  
304 *remanei*, two clusters of closely linked *med* paralogues were found (COROIAN *et al.* 2005; MADURO *et al.*  
305 2005a). Similar linked duplications of these genes were found in other species. Among the *end* genes  
306 shown in Fig. 3A, 7/10 species with at least two *end-3* genes show two of them within 10 kbp. Among  
307 the 18 species with at least two *med* genes, linked pairs can be found in nine of them, in which at least  
308 two *med* genes occur within 5 kbp of each other. Examples of linked *med* duplications are shown for  
309 four of the Elegans supergroup species in Fig. 3B. In the most extreme case, 9/25 *C. brenneri med*  
310 orthologs are clustered across a 23-kbp region, with an additional tandem pair located ~22 kbp away.  
311 Linked duplications are therefore a common occurrence, particularly for the *med* genes.

### 312 **ABSENCE OF A CONSERVED INTRON IN THE ELEGANS GROUP *med* GENES**

313 I next examined the evolutionary changes in *med* and *end* gene structures across the Elegans  
314 supergroup. For simplicity, a single representative *med*, *end-3* and *end-1* gene was used for each species  
315 because intraspecific paralogs generally showed identical splicing patterns. The gene structures are  
316 shown in scale diagrams in Fig. 4A, depicting intron/exon structures arranged by the phylogeny of  
317 Stevens *et al.* (2019). Intron positions are also indicated on diagrams of the predicted proteins in Fig. 8.

318 Of particular significance, prior work found that the *med* genes of *C. elegans*, *C. briggsae*, and *C. remanei*  
319 have no introns, unlike all other GATA factors in these species including the *end* genes (COROIAN *et al.*  
320 2005; GILLIS *et al.* 2008; MADURO *et al.* 2001). As shown in Fig. 4A, while all representative *med* genes  
321 were found to be intronless across the Elegans group, the *meds* from the Japonica group share a  
322 common intron (indicated by an asterisk) within the C4 zinc finger coding region that is found in the  
323 same position in all *end-1* and *end-3* genes. In addition to this conserved intron, within the Japonica  
324 group, the *C. japonica* and *C. panamensis med* genes each have one more upstream intron at non-  
325 homologous positions.

### 326 DIFFERENCES IN INTRONS AMONG *end-3* AND *end-1* GENES

327 The conserved zinc finger intron is the only one shared between the *end-3* and *end-1* genes (Fig. 4A). As  
328 a group, the *end-3* orthologs show the highest variability in the number of introns, with *C. tropicalis*  
329 having only the one conserved intron, *C. becei* having four introns total, and the remaining species  
330 having two or three. The *end-1* orthologues are far less diverse, sharing the same four exons with three  
331 introns, except for *C. Brenneri* which is missing the second intron. In terms of size, the *end-3* introns tend  
332 to be smaller overall, with introns larger than 100 bp most apparent within the Elegans group *end-1*  
333 genes. Hence, the positions of introns in the *end-1* orthologues appear to be under a greater constraint  
334 than those of the *end-3* genes.

### 335 IDENTIFICATION OF CONSERVED PROMOTER MOTIFS

336 The occurrence of *med* and *end* genes in 20 related species affords the opportunity to identify  
337 conserved *cis*-regulatory sites and infer conservation of the structure of the gut specification network.  
338 The expectation is that conserved regulatory inputs found in *C. elegans* should be reflected in the  
339 occurrence of similar *cis*-regulatory sites mediating the same promoter-DNA interactions in the other  
340 species. I first searched for known binding sites for *C. elegans* factors among the Elegans supergroup  
341 *med* and *end* orthologues using methods previously used in *C. elegans* (MADURO *et al.* 2015). A size of  
342 600bp upstream of the ATG was chosen for these and subsequent analyses, as the known regulatory  
343 interactions with the *C. elegans med* and *end* genes generally occur within a few hundred base pairs of  
344 the ATG (BHAMBHANI *et al.* 2014; BROITMAN-MADURO *et al.* 2005; MADURO *et al.* 2001; SHETTY *et al.* 2005).  
345 Among the *med* upstream regions, I found only widespread conservation of SKN-1-like sites, and among  
346 the *end-3* orthologues, only MED sites (Supplemental Tables S1, S2 and S3). While these results support  
347 conservation of activation of *med* orthologues by a SKN-1-like factor, and activation of *end-3* orthologs  
348 by MED-like factors, a complementary (and superior) approach is to search for over-represented motifs  
349 *ab initio*. I therefore searched 600bp upstream of representative *med* and *end* genes from all 20 species  
350 using the MEME discovery algorithm (BAILEY and ELKAN 1994). The results are summarized in Fig. 4B, with  
351 the sites indicated by color coded circles on the promoters in Fig. 4A. The locations of the sites  
352 diagrammed in Fig. 4 are listed in Supplemental File S1.

### 353 SKN-1 BINDING SITES IN THE *med* AND *end* GENES

354 Among the *med* orthologues, a motif resembling two overlapping SKN-1 sites was identified 19/20  
355 species. The core of this motif, RTCATCAT, was found in two clusters in the *C. elegans med* genes and  
356 DNA fragments containing these sites are capable of binding recombinant SKN-1 DNA-binding domain *in*  
357 *vitro* (MADURO *et al.* 2001). The same core is found in SKN-1 binding sites in *gcs-1*, a known SKN-1 target

358 gene in the fully developed intestine (AN and BLACKWELL 2003). As in *C. elegans*, the SKN-1 sites in the  
359 *med* genes are found within 300 bp of the predicted start site in most of the other species, which is  
360 apparent from the diagram in Fig. 4A. In *C. panamensis*, which contains only a single putative *med* gene,  
361 an RTCATCAT site was not identified by MEME although six 'core' RTCAT sites were found by direct  
362 searching ( $p \leq 0.05$ , Poisson distribution). The low E-value of  $1.1e-102$  and presence of an average of 3.5  
363 sites per species strongly suggest that activation of *med* orthologous genes likely occurs by SKN-1 in  
364 most Elegans supergroup species.

365 Among the *end-1* and *end-3* genes, a TCATTYTCATC site was identified by MEME in 12/20 *end-1* genes  
366 and 14/20 *end-3* genes (E-value  $2.9e-11$ ). Most of this site (underlined) overlaps with 8/9 bases of the  
367 WWWRTCATC site for SKN-1 (ETHEVE *et al.* 2016; MATHELIER *et al.* 2014). Unlike the SKN-1 sites in the  
368 *med* genes, which occur an average of 3.5 times per gene, these putative SKN-1 sites in the *end* genes,  
369 when present, occur only 1.5 times per *end-1* gene and 1.6 times per *end-3* gene. I hypothesize that this  
370 site represents a degenerate SKN-1 binding site. Prior evidence in *C. elegans* had suggested that SKN-1  
371 contributes directly to *end-1,3* activation independently of the MEDs, though the precise sites have not  
372 been reported (MADURO *et al.* 2015).

### 373 **Sp1 BINDING SITES**

374 A motif resembling the binding site for Sp1 was found in the *med* promoters (17/20 species, E-value of  
375  $2.0e-33$ ), *end-1* (20/20 species), and *end-3* promoters (15/20 species), with an E-value of  $4.8e-55$  for the  
376 two *end* genes. This same motif has been found among many *C. elegans* promoters, suggesting that  
377 regulation by Sp1 is not restricted to gut specification (GRISHKEVICH *et al.* 2011). Reduction of function of  
378 *sptf-3*, a gene encoding an Sp1-like factor, causes a decrease in specification of E and a reduction in  
379 expression of *end-1* and *end-3* reporters (SULLIVAN-BROWN *et al.* 2016). From the widespread  
380 conservation of the Sp1 binding sites, it is likely that Sp1 contributes to E specification across many  
381 species in the Elegans supergroup through direct binding of the *med*, *end-1* and *end-3* orthologous  
382 genes.

### 383 **MED BINDING SITES IN THE *end-1* AND *end-3* GENES**

384 Prior work identified the binding sites for the MED factors in the *end-1* and *end-3* genes, defining a core  
385 sequence of AGTATAC that is distinct from the HGATAR site of canonical GATA factors (BROITMAN-  
386 MADURO *et al.* 2006; BROITMAN-MADURO *et al.* 2005; LOWRY *et al.* 2009). As anticipated by the results from  
387 searching for this site directly, MEME identified a highly conserved MED site motif in 9/20 *end-1* genes  
388 and 20/20 *end-3* genes (E-value  $7.8e-53$  across both *end-1* and *end-3*). Across the nine species with MED  
389 sites identified in *end-1*, there are an average of 1.2 sites per gene, while for *end-3*, there are 2.6 sites on  
390 average. The location and spacing of the sites are consistent with results from *C. elegans*, with sites  
391 occurring within 200 bp of the predicted translation start site and showing a spacing (when multiple  
392 sites are present) of  $\sim 50$  bp (BROITMAN-MADURO *et al.* 2005).

### 393 **POLYPYRIMIDINE MOTIF**

394 MEME identified a pyrimidine-rich motif in 15/20 *end-1* genes and 9/20 *end-3* genes (E-value  $2.5e-05$ ).  
395 This motif, consisting primarily of C and T, is most apparent among the Japonica group *end-1* genes. The  
396 complement of the pyrimidine-rich motif is purine-rich, hence these motifs are called PPY/PPU

397 (polypyrimidine/polypurine) tracts (SAWICKA *et al.* 2008). This motif did show a strand bias by gene:  
398 30/34 sites among the *end-1* genes have the polypyrimidines on the top strand, while the sites are  
399 evenly on either strand (9/16 on the top strand) in the *end-3* genes. Polypyrimidine tracts are generally  
400 associated with messenger RNAs where they would be present as one strand, and interact with  
401 polypyrimidine-tract binding proteins (PTBs) (SAWICKA *et al.* 2008). Curiously, Pur-alpha-like protein (PLP-  
402 1), a factor that binds a purine-rich sequence, was previously identified as having a regulatory input into  
403 *end-1* activation in *C. elegans* (WITZE *et al.* 2009). However, the PPY/PPU motif identified by MEME was  
404 not found in either of the *C. elegans end* genes.

#### 405 **ADDITIONAL OVERREPRESENTED MOTIFS**

406 Three additional sites were found by MEME among the *med* genes. A motif containing a TCTKCAC core  
407 was found in 9/20 species *med* genes with an average of 1.6 sites per gene (E-value 4.2e-08). The motif  
408 sequence does not immediately suggest a putative regulatory factor, although it tends to be found  
409 among the SKN-1 sites, suggesting it is related to SKN-1 binding. A motif containing TTTNNAAA was  
410 found at a higher E-value of 2.3e-04 in 10/20 *med* genes with an occurrence of 3.3 sites per gene, with  
411 one species *C. zanzibari*, containing 16 of them. This site resembles previously identified periodic AT  
412 clusters (PATCs) suggesting it may be a more general motif (FROKJAER-JENSEN *et al.* 2016). A motif  
413 resembling a TATA-box was found in 13/20 species' *med* genes with an even higher E-value of 1.3e-02  
414 (GRISHKEVICH *et al.* 2011). This may be a *bona fide* basal promoter site, as it is found within tens of base  
415 pairs from the translation start in these 13 genes. Finally, among the *end* genes, an "SL1 motif" was  
416 found in 12/20 *end-1* genes and 11/20 *end-3* genes (E-value 8.5e-04) (GRISHKEVICH *et al.* 2011). The motif  
417 was not found in the *C. elegans end-1/3* genes, consistent with prior work that neither of these in *C.*  
418 *elegans* are not known to be *trans*-spliced to the SL1 sequence (ALLEN *et al.* 2011; ZHU *et al.* 1997). Its  
419 relevance as a motif is uncertain, as in most of the *end* promoters that contain it, the site is more than  
420 300bp upstream of the predicted start site.

#### 421 **PHYLOGENETIC ANALYSIS CONFIRMS THAT MED, END-3 AND END-1 FORM DISTINCT CLADES**

422 The gene structure and promoter motifs suggest that the *med*, *end-3* and *end-1* genes form distinct  
423 families among the 20 species of the Elegans supergroup. To confirm that this is reflected at the protein  
424 level, I aligned the DNA-binding domains (DBDs) among representative MED, END-3 and END-1 factors  
425 (one per species) and used this to construct a phylogenetic tree *ab initio* with the RAxML-NG method  
426 (KOZLOV *et al.* 2019; STAMATAKIS 2014). As shown in Fig. 5, MED, END-3 and END-1 form three broad  
427 clades, with the END-1 factors showing the highest similarity as a group, followed by the END-3 factors,  
428 and finally the more diverse MED factors. A high diversity of the MED factors was previously observed  
429 among the *med* genes from *C. elegans*, *C. briggsae* and *C. remanei* (COROIAN *et al.* 2005). The grouping of  
430 the factors increases confidence that the correct orthologues have been assigned and shows that  
431 different rates of protein evolution have occurred among the three factors.

#### 432 **GENE AMPLIFICATION WITHIN AND AMONG SPECIES**

433 While *end-1* is represented by a unique orthologue among all species (except *C. brenneri* which may  
434 have two *end-1* genes), *med* and *end-3* orthologues are often found as two or more duplicate genes  
435 within a species. The two *C. briggsae* END-3 paralogues are highly similar, suggesting recent duplication,  
436 and the multiple *med* genes among *C. elegans*, *C. briggsae* and *C. remanei* are also much more alike

437 within each species (COROIAN *et al.* 2005; MADURO *et al.* 2005a). To test how general this phenomenon is,  
438 I aligned and constructed trees for all MED DBDs, and separately, the END DBDs. In the tree of MED  
439 factors shown in Fig. 6, most *med* duplications have occurred post-speciation from a small number of  
440 founding genes. The 20 MED factors in *C. doughertyi* cluster in a way that suggests there may have been  
441 only one or two ancestral *med* genes that underwent multiple rounds of amplification. In the case of *C.*  
442 *brenneri*, the MEDs form two clusters of 22 and 3 genes each, suggesting there were only a few  
443 ancestral factors. A similar division occurs among the *C. tropicalis* MEDs, which suggests two ancestral  
444 *med* genes. There are three groups in which paralogous MED factors are clustered within species pairs:  
445 *C. briggsae* with *C. nigoni*, *C. becei* with *C. nouraguensis*, and *C. latens* with *C. remanei*. Within each  
446 cluster, the pattern suggests that both species inherited two or three *med* paralogues from a common  
447 ancestor, which then each underwent further amplification post-speciation. Among the remaining 9  
448 species that have 2-5 *med* genes each, the paralogous MEDs clustered together as a single group,  
449 suggesting a single ancestral gene. This unusually widespread pattern of duplications both pre- and post-  
450 speciation, not seen in the *end* genes, shows that the *med* genes are under different evolutionary  
451 constraints.

452 I note here that six genes were found that encoded MED-like factors with two C4 zinc fingers, indicated  
453 on the tree in Fig. 6. In each case, the two fingers were highly similar, so only one of the two fingers was  
454 used to generate the tree. Four of the genes were present as two paralogous pairs in *C. nigoni*, one was  
455 found in *C. briggsae*, and another was found in *C. brenneri* (Fig. 6). *C. nigoni* and *C. briggsae* are very  
456 closely related, suggesting they inherited the same two-fingered *med* gene from a common ancestor  
457 (KIONTKE *et al.* 2011). The positions of the six two-fingered MED factors in the phylogeny are hence  
458 consistent with two-finger MED-type GATA factors having arisen twice, likely by an interstitial  
459 duplication, because the two fingers in each share a nearly identical amino acid sequence. The  
460 observation of putative two-fingered GATA factors is noteworthy because among vertebrates, GATA  
461 factors generally have two zinc fingers (GILLIS *et al.* 2009; LOWRY and ATCHLEY 2000).

462 A tree of the DBDs of the END-1 and END-3 orthologues is shown in Fig. 7. As mentioned earlier, all END-  
463 1 orthologues are unique in each species except for the two possible *end-1* paralogues in *C. brenneri*.  
464 Among the END-3s, intraspecific amplification was implied for all species with two or more END-3s,  
465 except for a cluster containing END-3 paralogues from *C. sinica*, *C. tribulationis*, and *C. zanzibari*. This  
466 portion of the tree is most consistent with two paralogous *end-3* genes having been present in the  
467 common ancestor of all three species. Hence, duplications do occur among the *end-3* paralogues, but at  
468 a far lower frequency than with the *med* genes.

#### 469 **CONSERVED DOMAINS OF MED, END-3 AND END-1**

470 Prior alignments of the ENDS from *C. elegans* and *C. briggsae* revealed three conserved domains: An  
471 amino-terminal polyserine (Poly-S) region, a short region immediately upstream of the zinc finger, called  
472 the Endodermal GATA Domain (EGD), and the GATA-type zinc finger and basic domains (MADURO *et al.*  
473 2005a). Among the MEDs, only the latter two domains were conserved (COROIAN *et al.* 2005). Taking  
474 advantage of the 20 *Elegans* supergroup species, we aligned representative MED and END proteins to  
475 both generalize these earlier findings and to identify other conserved domains that might have been  
476 missed. The alignments revealed both expected and previously unknown conserved regions, shown

477 diagrammatically in Fig. 8. On this figure, the corresponding positions of introns are also indicated to  
478 reveal patterns of conservation of the gene structure in relation to these conserved regions.

#### 479 **MED, END-3 AND END-1 DNA-BINDING DOMAINS**

480 An alignment of representative DBDs for the MED, END-3 and END-1 factors, one per species, is shown  
481 in Fig. 9 (EDGAR 2004). Consistent with their recognizing an atypical binding site, the MED DBDs share  
482 features that distinguish them from the END-3 and END-1 DBDs (Fig. 9A). Among the *Elegans* group MED  
483 factors, the C4 zinc finger has 18 amino acids between the two pairs of cysteines, with a structure of  
484 CXXC-X<sub>18</sub>-CXXC, while the Japonica group members are diverged from this structure and have 16-17  
485 amino acids, i.e. CXXC-X<sub>16-17</sub>-CXXC. A consensus sequence with 11 invariant amino acids is shown below  
486 the alignment in Fig. 9A. While the group of MED factor DBDs appear to be diverse, the identification of  
487 a conserved MED-like motif among the *end-3* promoters suggests that the MED factors have  
488 nonetheless coevolved to continue recognizing a similar binding site in each species. The solution  
489 structure of a *C. elegans* MED-1 DBD::binding site complex revealed that recognition of the MED binding  
490 site is mediated by 9 amino acids, indicated at the bottom of Fig. 9A (LOWRY *et al.* 2009). In comparing  
491 these with the corresponding amino acids in the other MED DBDs, there is evidence of conservation as  
492 shown by asterisks. Two of the 9 amino acids, a tyrosine (Y) and arginine (R) just after the zinc finger, are  
493 invariant. Five of the remaining amino acids are found in most of the MED DBDs. The remaining two are  
494 the isoleucine (I) and the first arginine in the zinc finger. The arginine is somewhat conserved, as in most  
495 MEDs it is an arginine or a lysine (K), both of which are basic. The isoleucine (I) is not conserved,  
496 however, and is replaced by a cysteine (C) in most other MEDs. This amino acid may not be critical for  
497 recognition of a MED binding site, however, as prior work showed that transgenes containing individual  
498 *med* genes from *C. briggsae* and *C. remanei* can fully complement the embryonic lethal phenotype of *C.*  
499 *elegans med-1; med-2* double mutants; in the MED factors from both of these species, the  
500 corresponding amino acid is a cysteine. Overall, despite the higher divergence among the MEDs as a  
501 group, there appears to be selection for the 8/9 amino acids known to be involved in site recognition in  
502 *C. elegans* MED-1. Added to the apparent conservation of MED-like binding sites in the respective *end-3*  
503 orthologues in every species, the data suggest maintenance of the DNA-binding specificity of the MEDs.

504 In contrast with the divergent MEDs, the DBDs of the END-3 and END-1 orthologues are more alike and  
505 share greater similarity to those of canonical GATA factors. The ENDS, ELT-2 and cGATA have an  
506 invariant CXXC-X<sub>17</sub>-CXXC zinc finger structure with 17 amino acids between the 2<sup>nd</sup> and 3<sup>rd</sup> cysteines.  
507 Consensus sequences for END-3 and END-1, shown below the alignments in Figs. 9B and 9C, contain 23  
508 invariant amino acids for END-3, and 31 for END-1, i.e. 2x and 3x more than the 11 invariant amino acids  
509 among the MED DBDs. A solution structure for END-1 or END-3 has not been reported, but as a  
510 surrogate I have shown, beneath both alignments, the 18 amino acids in the cGATA1 zinc finger known  
511 to mediate base contacts (OMICIANSKI *et al.* 1993). END-3 is conserved at 7/18 of these positions with 4  
512 amino acids being invariant, while END-1 has 10/18 positions conserved, of which 8 are invariant. Hence  
513 the END-1s are structurally more like cGATA1 than are the END-3s, plus the END-1 orthologues are also  
514 invariant at more positions, indicating that they are under the most evolutionary constraint.

515 An amino acid in the END-3 DBD is worth further comment. The proline between the 3<sup>rd</sup> and 4<sup>th</sup>  
516 cysteines of the zinc finger, in sequence CNPC, was substituted by a leucine in the EMS-induced *C.*

517 *elegans* mutant *end-3(zu247)* (MADURO *et al.* 2005a). This mutant has a phenotype indistinguishable  
518 from the null mutant *end-3(ok1448)* which lacks most of the DBD (OWRAGHI *et al.* 2010). While this  
519 position is also a proline in 12/20 species, among the other END-3s it is serine (S) or alanine (A). Serine  
520 has a short polar side chain, while alanine is short and hydrophobic, however leucine is also hydrophobic  
521 but longer, suggesting that the longer side chain at this position compromises the structure of the zinc  
522 finger. This position is variable among the MED and END-1 orthologues, where it is a proline (P), alanine  
523 (A), serine (S), or glycine (G), indicating this position is under relaxed selection.

524 Another difference between the END-3s and END-1s is the amino end of the C4 zinc finger between the  
525 1<sup>st</sup> and 2<sup>nd</sup> cysteines. GATA factors in general, including the MEDs, END-3, ELT-2 and cGATA1, have two  
526 amino acids in the pattern CXXC. Most of the END-3s are CSNC, while the END-1s have either CSNPNC  
527 (12 species), CSNPSC (6 species), CSNQNC (*C. afra*) or CNPNC (*C. becei*). It is not known what effect the  
528 extra one or two amino acids have on the structure of the zinc finger, however this variation in structure  
529 is found only in the END-1 orthologues.

530 Finally, as a set, the DBDs from the MEDs and ENDS of a subset of the *Elegans* supergroup species are  
531 shown with ELT-2 and cGATA1 in Fig. 9D, showing that all three factors share conserved amino acids  
532 with each other and with canonical GATA factors. Overall, 7/18 of the amino acids known to mediate  
533 DNA recognition in cGATA1 are broadly conserved (OMICHIANSKI *et al.* 1993).

#### 534 **SERINE-RICH DOMAINS IN MEDs AND ENDS**

535 The MED and END factors share an upstream region of variable size enriched in the polar amino acids  
536 serine, with or without threonine. These are shown diagrammatically in Fig. 8, as the amino-most  
537 conserved domain among the MEDs and ENDS, and in amino acid sequence alignment in Fig. 10A.  
538 Among the MEDs, the Poly-S/T region is variable in size, consists of both serines and threonines, and is  
539 the only other conserved feature upstream of the DNA-binding domain. Because of the size variability,  
540 the alignment in Fig. 10A represents only part of an overlapping region among MEDs of all 20 species.  
541 Among the ENDS, a similar Poly-S domain, consisting almost exclusively of homopolymeric clusters of  
542 serines, is found at the amino terminus starting at the 3<sup>rd</sup> or 4<sup>th</sup> amino acid (Fig. 10A). In one exception,  
543 the Poly-S domain is all but gone in *C. japonica* END-3. As noted earlier, the Poly-S region had been  
544 previously recognized in the *C. elegans* and *C. briggsae* *end* genes (MADURO *et al.* 2005a).

545 An unexpected feature of the Poly-S region in the *end* genes bears further description. Although serine is  
546 coded by six codons – TCT, TCC, TCA, TCG, AGT and AGC – the serines among the Poly-S regions in the  
547 *end-3* and *end-1* orthologues are coded almost exclusively (99%, 554/557) by TCN codons (N=any base).  
548 Moreover, two of the four TCN codons, TCT and TCC, are used 50% and 22% of the time. Among *C.*  
549 *elegans* genes, TCN represents 75% of serine codons, and among these, TCT and TCC occur only 28% and  
550 13% of the time, respectively (<https://www.kazusa.or.jp/codon/>). This preferential use of TCT and TCC  
551 codons for serine in the Poly-S regions, among the TCN codons, is statistically significant ( $p < 10^{-40}$ ,  $\chi^2$ -  
552 test). The implications of this codon bias are discussed later.

#### 553 **CONSERVATION OF THE END FAMILY GATA DOMAIN (EGD)**

554 Previous work identified the END family GATA Domain, or EGD, immediately upstream of the *C. elegans*

555 and *C. briggsae* END-1 and END-3 DBDs (MADURO *et al.* 2005a). This domain does not occur among the  
556 other *C. elegans* GATA factors, suggesting it is uniquely important for function of END-1 and END-3.  
557 Among the 20 species in the Elegans supergroup, the END-1 and END-3 orthologues across 20 species do  
558 contain a conserved region immediately upstream of the zinc finger. This is shown diagrammatically in  
559 Fig. 8, and by sequence alignment in Fig. 10B. Whereas the original report had the domain consisting of  
560 the 9 amino acids, an extended domain is apparent that consists of approximately 25 amino acids. 7 of  
561 these (shown by an asterisk in the figure) are highly conserved between the END-3 and END-1 factors,  
562 but there are conserved amino acids within each group of factors, plus the domain is more conserved  
563 among the END-3 orthologues. While the EGDs tend to be enriched in basic amino acids, their  
564 significance remains unknown.

### 565 **END-1 SPECIFIC DOMAINS**

566 Among the END-3 orthologues, the region between the Poly-S and the EGD regions is variable in size and  
567 does not exhibit sequences with extensive conservation (Fig. 8). In contrast, the END-1 orthologues  
568 display three additional domains that are highly conserved across all 20 species (Figs. 8 and 10C). A  
569 consensus sequence shows high conservation with many invariant regions. These domains are  
570 apparently novel, as a BLAST search using this region of END-1 did not identify related proteins other  
571 than predicted orthologues of END-1 within *Caenorhabditis*. With the identification of these extended  
572 sequence similarities, the END-1 orthologues across the 20 species are highly conserved throughout  
573 their lengths, while the END-3 and MED orthologues are conserved only in parts.

574

## 575 **Discussion**

576

577 In this work I have identified and compared the gene and protein structures of the MED, END-3 and  
578 END-1 GATA transcription factors among 20 *Caenorhabditis* species of the Elegans supergroup.  
579 Predictions were made by manual curation, informed by known features of the network from *C. elegans*  
580 and informed by comparison of gene and protein structures together. The results confirm coevolution of  
581 *cis*-regulatory sites, gene structures and protein sequence over tens of millions of years of evolution.  
582 Many of the conserved features, including the DNA-binding domains, and binding sites for SKN-1, MED,  
583 and an Sp1-like factor, are consistent with known properties of the *med* and *end* genes in *C. elegans*  
584 (BROITMAN-MADURO *et al.* 2005; MADURO *et al.* 2015; MADURO *et al.* 2001; SULLIVAN-BROWN *et al.* 2016).  
585 Prior work has also shown that orthologous *meds* and/or *ends* from a few of these species can function  
586 as transgenes in *C. elegans* (COROIAN *et al.* 2005; MADURO *et al.* 2005a). Hence, I hypothesize that the  
587 *med*, *end-3* and *end-1* genes function in a core endoderm specification network across the Elegans  
588 supergroup that originated in a common ancestor.

### 589 **HIGH RATES OF MED GENE DUPLICATION**

590 The *med*, *end-3* and *end-1* genes showed distinct patterns of gene duplication among species.  
591 Occurrence of duplicate *med* genes is disproportionately high, with an average of 5.6 *med* genes per  
592 species, compared with 2.0 *end-3* genes and a single *end-1* per species, except for *C. brenneri* which may



593 have two *end-1* genes (Fig. 2). In most cases, sequence similarity was consistent with most *med*  
594 duplicates having arisen post-speciation, with the only exceptions resulting from likely inheritance of  
595 two *med* genes in a recent common ancestor (Fig. 6).

596 The apparent recent amplification of the *meds* suggests that there is ongoing selective pressure for  
597 increased *med* expression. The occurrence of MED binding sites in the *end* genes (particularly *end-3*)  
598 argues for positive selection for the presence of these sites, and hence the MED factors that can bind  
599 them. Selection for increased *med* expression is supported by work showing that *C. elegans* has an  
600 unusually high rate of segmental duplications compared with other species, with a higher gene dose  
601 generally leading to increased mRNA production (KONRAD *et al.* 2018). In *C. elegans*, a single  
602 chromosomal *med* gene is sufficient for completely normal development (MADURO *et al.* 2007).  
603 However, *C. elegans* has only two *med* genes. Perhaps in some of the other species, the MED factors  
604 have become degenerate in their ability to activate target genes, or to be activated. Protein degeneracy  
605 would be consistent with the lower degree of protein sequence conservation among the MED DNA-  
606 binding domains in *C. brenneri*, which has experienced an extreme amplification of *med* genes (Fig. 9).  
607 However, that does not explain amplification of *med* genes in *C. doughtertyi*, whose MED DNA-binding  
608 domains are more similar as a group, unless they are collectively degenerate in some way (Fig. 9).  
609 Regardless of the mechanism driving MED amplification, there is support for reduced fitness if MED-  
610 dependent input into endoderm specification is compromised. Recent work has found that loss of MED  
611 binding sites in the *end* genes in *C. elegans* results in aberrant intestinal lineage development, metabolic  
612 defects, and reduced viability (CHOI *et al.* 2017; MADURO *et al.* 2015). Another possibility, not mutually  
613 exclusive, is that degeneracy of MED function leads to embryonic lethality due to a failure to specify the  
614 MS blastomere (MADURO *et al.* 2001). Hence, whatever mechanism driving increased *med* dosage may  
615 not be due to the role of the MEDs in gut specification.

#### 616 **LINKAGE OF END ORTHOLOGUES**

617 In most species, *end-1* was found within ~35 kbp of *end-3* (Fig. 3A). One possibility for maintenance of  
618 this synteny is that the two genes may be coregulated. Three lines of evidence argue against this  
619 possibility, at least for *C. elegans*. First, there is at least one unrelated gene between the *ends*, the  
620 neural gene *ric-7* (HAO *et al.* 2012). Second, the *end-1,3* genes are not precisely co-expressed as  
621 accumulation of *end-3* mRNA precedes that of *end-1* (BAUGH *et al.* 2003; MADURO *et al.* 2007; RAJ *et al.*  
622 2010). Third, unlinked single-copy transgenes of wild-type *end-1* and *end-3* are able to completely  
623 replace function of the endogenous genes when introduced into an *end-1,3(-)* strain, suggesting that  
624 linkage is not a prerequisite for their expression (MADURO *et al.* 2015). It may be, therefore, that synteny  
625 of *end-1* and *end-3* merely reflects their origin as a tandem duplication of an ancestral *end* gene.

#### 626 **IDENTIFICATION OF KNOWN AND PREVIOUSLY UNRECOGNIZED *cis*-REGULATORY SITES**

627 The MEME search recovered binding sites for regulators previously known to activate the *med* and *end*  
628 genes in *C. elegans* (Fig. 4B). In the case of the *med* orthologues, this was binding sites for SKN-1, while  
629 for the *end* genes, it was binding sites for both SKN-1 and MED-1. The conservation of these sites  
630 supports the hypothesis that these genes have maintained the same regulatory hierarchy as in *C.*  
631 *elegans*, with SKN-1 activating the *med* genes, and both SKN-1 and the MED proteins activating the *end*  
632 genes. The MED sites in the *Elegans* supergroup *end* genes are found in all *end-3* orthologues but only

633 9/20 *end-1* orthologues, following the same pattern as in *C. elegans*: *end-3* has four MED sites and these  
634 are collectively essential for *end-3* activation, although even a single MED site in a single-copy *end-3*  
635 transgene is sufficient for activation (MADURO *et al.* 2015). In contrast, *end-1* has only two MED sites, and  
636 these are less important for *end-1* expression due to parallel input by TCF/POP-1 and PAL-1 (MADURO *et al.*  
637 *et al.* 2015; MADURO *et al.* 2005b). The likely sites for SKN-1 in *end-1* and *end-3* were not previously known  
638 because they do not contain the same pattern of SKN-1 site core sequences as present in the *med*  
639 promoters. An intriguing hypothesis is that the SKN-1 sites in the *end* genes may be of lower affinity  
640 than those in the *med* genes. Because expression of the *end* genes is delayed by at least one cell cycle  
641 compared with *med-1,2*, lower-affinity SKN-1 sites could potentially allow for delayed activation. A  
642 similar affinity difference has been hypothesized for early- and late-acting binding sites of the pharynx  
643 regulator PHA-4 (GAUDET *et al.* 2004). As the SKN-1 sites in the *end* genes were not found in all species, it  
644 is possible that the input from SKN-1 is lost in some species. Finally, an additional suspected regulatory  
645 input was from an Sp1-like factor, likely to be SPTF-3 (SULLIVAN-BROWN *et al.* 2016). Most of the *med*,  
646 *end-3* and *end-1* orthologues have a consensus Sp1 binding site (Fig. 4B). Together, the recovery of these  
647 sites from an *ab initio* search of their putative promoters lends strong support to the hypothesis of  
648 conservation of this gene network across the Elegans supergroup.

649 MEME-identified sites of lower significance, and not as broadly conserved, were either unknown or  
650 reflected putative core promoter elements. These include one with core sequence TCTKCAC, a  
651 polypyrimidine motif, putative PolyA/T cluster, a TATA-binding protein (TBP) site, and an SL1 motif. The  
652 latter two were previously found in many promoters in five Elegans supergroup species (GRISHKEVICH *et al.*  
653 *et al.* 2011). The putative PolyA/T cluster is associated with germline expression (FROKJAER-JENSEN *et al.*  
654 2016). The other two motifs were of unknown significance. The TCTKCAC motif is found in *C. elegans*  
655 *med* genes, hence it is possible to test its significance directly. The site was found three times close to  
656 the previously identified SKN-1 sites, suggesting it may play an accessory role to SKN-1 activation,  
657 perhaps by SKN-1 itself.

658 What was particularly conspicuous was that sites for minor regulatory inputs known in *C. elegans* were  
659 not found to be widely conserved, either by a direct search or through MEME. This includes sites for  
660 TCF/POP-1 and the Caudal orthologue PAL-1, both of which are genetically known to contribute to *end-1*  
661 expression, and for which binding sites are known or suspected based on prior work (BHAMBHANI *et al.*  
662 2014; MADURO *et al.* 2005b; ROBERTSON *et al.* 2011; SHETTY *et al.* 2005). *C. elegans* END-3 is also a  
663 suspected contributor to activation of *end-1* (MADURO *et al.* 2007). The failure to recover sites for these  
664 regulators suggests that either these inputs exist in the other species and are not recognizable, or more  
665 likely, that different species have qualitatively different minor regulatory inputs. The apparent  
666 difference in regulatory input of SKN-1 and POP-1 in *C. briggsae*, revealed through cryptically different  
667 reduction-of-function phenotypes between *C. briggsae* and *C. elegans*, suggests that reinforcing  
668 regulatory inputs may evolve rapidly (LIN *et al.* 2009). Even within *C. elegans*, widespread cryptic  
669 variation in input from SKN-1 and the Wnt pathway (which acts through POP-1) was observed among *C.*  
670 *elegans* wild isolates (TORRES CLEUREN *et al.* 2019). An emerging model seems to be that the core SKN-1  
671 → MED → END-1,3 regulatory cascade is conserved, while additional regulatory inputs that reinforce  
672 this cascade evolve rapidly and would thus be expected to be species-specific. Putative *cis*-regulatory

673 sites that mediate these supporting inputs might therefore occur in only a subset of species in the  
674 *Elegans* supergroup and would be missed in the analysis done here.

#### 675 **END-3 AND END-1: THE SAME BUT DIFFERENT**

676 In *C. elegans*, *end-1* and *end-3* clearly have overlapping function. Complete loss of both genes has a fully  
677 penetrant failure to specify endoderm, while null alleles either for gene alone have either no effect (*end-*  
678 *1*) or a weak effect (*end-3*) on gut specification (MADURO *et al.* 2005a; OWRAGHI *et al.* 2010). A similar  
679 result was obtained using RNAi in *C. briggsae* (MADURO *et al.* 2005a). As well, overexpression of either  
680 *end* gene in *C. elegans* is sufficient to induce endoderm differentiation in non-endodermal lineages  
681 (MADURO *et al.* 2005a; ZHU *et al.* 1998). Within their DNA-binding domains, the END-3 and END-1  
682 orthologues are clearly more similar to each other than they are to the MEDs (Figs. 5, 9).

683 Despite these similarities, END-3 and END-1 differ in ways that suggest they have at least some unique  
684 functions. First, the END-1 DBDs are more highly conserved as a group, while those of END-3 are under  
685 slightly more relaxed selection. This is apparent in the way that the DBDs appear in a phylogenetic tree  
686 (Fig. 7) and in the degree of invariant amino acids in an alignment (Figs. 9B, 9C). Within their DBDs, the  
687 END-1s have twice as many similar amino acids in common with vertebrate cGATA1 than the END-3s  
688 have in common with cGATA1, notably in acid positions known to mediate sequence recognition (Figs.  
689 9B, 9C).

690 Additional evidence is consistent with both shared and divergent activity of END-3 and END-1 in *C.*  
691 *elegans*. Recent work inferred the binding sites for *C. elegans* END-1 and END-3 as RSHGATAASR and  
692 RKWGATAAGR, respectively, which are very similar though not identical (LAMBERT *et al.* 2019; WEIRAUCH  
693 *et al.* 2014). Other work has shown that recombinant DNA-binding domains of *C. elegans* END-1 and  
694 END-3 can bind canonical GATA sites in the promoter of *C. elegans elt-2*, although END-1 has a higher  
695 affinity for such sites (DU *et al.* 2016; WIESENFAHRT *et al.* 2015). From this work, Endoderm GATA Domains  
696 (EGDs) immediately upstream of the DBDs show conserved amino acids between END-3s and END-1s  
697 but many more that are unique to either EGD (Fig. 10B). Although the function of the EGDs remains  
698 unknown, their conservation and proximity to the DBDs suggest an accessory role in protein-DNA  
699 interactions that is unique to the ENDS among the *Caenorhabditis* GATA factors.

#### 700 **THE POLY-S REGION OF END-3 AND END-1: PROTEIN DOMAIN OR POLYPYRIMIDINE TRACT?**

701 END-3 and END-1 share an amino-terminal segment, far from the DNA-binding domain, that is enriched  
702 for homopolymers of serine (Fig. 10A). Such a domain is not found in the other *C. elegans* GATA factors,  
703 nor is enrichment for serine found in vertebrate GATA factors (KANEKO *et al.* 2012; YANG *et al.* 1994). This  
704 suggests that the Poly-S domain plays some other function besides DNA binding and transactivation. The  
705 selection for TCT and TCC codons suggests that the Poly-S regions have been maintained for a reason  
706 other than a selection for what they contribute to the END-1 and END-3 proteins. Beyond transcriptional  
707 activation of the *end-1* and *end-3* genes, post-transcriptional regulatory mechanisms could potentially  
708 fine-tune END-1,3 protein levels. At the level of mRNA, the preference for these codons, as opposed to  
709 UCG and UCA, results in maintenance of a polypyrimidine tract in the mRNA. Support for a possible role  
710 of such a tract in the endoderm GRN is that in some species (e.g. *C. latens* and *C. remanei*), the *med*  
711 orthologues also have an apparent enrichment of T and C bases in the first part of their coding regions.

712 In other systems, polypyrimidine tract binding proteins (PTBs) have various roles in RNA metabolism,  
713 including regulation of splicing and mRNA stability, though in these cases the tracts occur outside of  
714 coding regions (SAWICKA *et al.* 2008). There is a *C. elegans* PTB gene, *ptb-1*, but its function has not been  
715 described. At the level of translation, repeats of the same UCY serine codon could cause starvation for  
716 limiting amounts of a particular seryl-tRNA<sup>Ser</sup>, leading to ribosome pausing (DARNELL *et al.* 2018).  
717 However, it is not clear why there would be selection to delay translation of *end* mRNA, particularly as  
718 given the rapid early cell divisions of the *C. elegans* embryo, it makes more sense to express the gene  
719 products as rapidly as possible. A more benign reason for the maintenance of the serine codon repeats  
720 is that they are an artifact of a trinucleotide repeat expansion process (KOREN and TRIFONOV 2011).  
721 Indeed, in that study, amino acid repeats in vertebrate proteins were most likely to be found in the first  
722 exon, i.e. at the amino end, consistent with their location in the *end-3* and *end-1* genes. Hence, the role  
723 of the Poly-S domain, if any, remains open for speculation until structure-function studies are  
724 performed.

#### 725 **END-1 ORTHOLOGUES ARE CONSERVED THROUGHOUT THEIR LENGTHS**

726 An additional unexpected finding emerged from the alignment of END-1 orthologues that distinguishes  
727 them among the MED/END proteins. Between the Poly-S and EGD domains, the END-3 orthologues as a  
728 group were diverse in size and sequence, whereas the END-1 orthologues were more similar in size and  
729 showed several regions of high conservation (Fig. 10C). These END-1-specific domains could be grouped  
730 into three regions containing blocks of invariant amino acids. The most striking of these is the center  
731 domain which contains an invariant sequence of FGQYF across all species END-1s. None of these highly  
732 conserved domains are found in other proteins, apart from predicted END-1 orthologues. The high  
733 conservation is further supported by the conservation of introns. The END-1s have four introns with only  
734 one of these absent in *C. brenneri* (Fig. 4A). In contrast, the END-3s were more likely to experience  
735 intron gains and losses over the same evolutionary time period, with most of these occurring in the  
736 variable region between the amino-terminal Poly-S and EGD domains (Fig. 8). A cursory examination of  
737 the amino acids in the END-1-specific domains suggests that these are on the outside of the protein,  
738 perhaps mediating protein-DNA or protein-protein interactions that do not occur with END-3 (data not  
739 shown).

740 Taken together, these data show that across the *Elegans* supergroup, the END-1s are highly conserved  
741 proteins with greater similarity to vertebrate GATA factors than the more diverse END-3s paralogues.  
742 This predicts that END-1 has unique features in transcriptional activation, and that the target genes  
743 activated by each of these factors are likely to include both and distinct targets.

#### 744 **MED ORTHOLOGUES: A DIVERGENT AND DIVERSE SUBCLASS OF GATA FACTORS**

745 The MED orthologues among the 20 species were found to be divergent from the END-3/END-1 factors,  
746 and to comprise a more diverse group of proteins themselves, even within the DNA-binding domain  
747 (Figs. 5, 9). The divergence of the DBD from that of the ENDS, ELT-2 and cGATA is expected, because the  
748 *C. elegans* MEDs were recognized to be divergent GATA factors that recognize a different binding site  
749 with an AGTATAC core (BROITMAN-MADURO *et al.* 2005; LOWRY *et al.* 2015). Despite the high divergence of  
750 the MED factors as a group, indicating relaxed selection, there is nonetheless maintenance of their  
751 binding site sequence over evolutionary time. This is supported by the conservation, across all 20

752 species, of most of the amino acids that were found to mediate protein-DNA recognition in *C. elegans*  
753 MED-1 (Fig. 9A), and more importantly, by the MEME identification of AGTATAC binding sites among all  
754 *end-3* orthologous genes and 9/20 *end-1* genes (Fig. 4). Furthermore, transgenes of most of the *C.*  
755 *briggsae* and *C. remanei* *meds* were individually able to complement *C. elegans med-1,2* double mutants  
756 in both gut and mesoderm specification despite limited conservation (COROIAN *et al.* 2005). Selection is  
757 likely not acting solely on the MEDs for *end* gene activation, as there are other direct MED targets in *C.*  
758 *elegans* whose orthologues in the Elegans supergroup were not investigated here, including in the early  
759 MS lineage (BROITMAN-MADURO *et al.* 2006; BROITMAN-MADURO *et al.* 2005). The lower conservation  
760 suggests that the MED DBDs may simply be more accommodating of amino acid substitutions than are  
761 the DBDs of END-3 or END-1.

762 Outside of the DNA-binding domain, the MEDs as a group lack the type of conserved regions seen in the  
763 ENDS. The only other feature found is a variable enrichment for serine and threonine of unknown  
764 significance. This region does not resemble the homopolymeric enrichment for serine that is at the  
765 amino end of the ENDS (Fig. 10A). Rather, it is a higher prevalence for S/T that lacks a recognizable  
766 context. A serine-threonine rich motif was found to be important for nuclear localization of the  
767 mineralocorticoid receptor in vertebrates, suggesting that this region of the MED orthologs may play a  
768 similar role (WALTHER *et al.* 2005). Until structure-function analyses are done, the significance of the  
769 serine/threonine enrichment will remain unknown.

#### 770 **THE MED/END CASCADE IS A DERIVED CHARACTER**

771 The existence of a gut-like precursor is a conserved lineage feature found in more distantly related  
772 nematode species (HOUTHOOFD *et al.* 2003; SCHIERENBERG 2006; SCHULZE and SCHIERENBERG 2011). It must  
773 therefore be that species outside the Elegans supergroup specify the gut precursor without MED/END  
774 factors. The most upstream factor SKN-1, and the downstream gut identity factor ELT-2, are also more  
775 widely conserved than just the Elegans supergroup (COUTHIER *et al.* 2004; SCHIFFER *et al.* 2014). Assuming  
776 that SKN-1 still specifies MS and E, the simplest hypothesis is that specification of gut outside of the  
777 Elegans supergroup occurs by direct activation of an *elt-2*-like gene directly by SKN-1. An attempt to  
778 demonstrate bypass of the *end-1* and *end-3* genes was successful using an *elt-2* transgene under  
779 regulatory control of the *end-1* promoter in a *C. elegans* strain lacking *end-1* and *end-3* (WIESENFAHRT *et al.*  
780 *al.* 2015). However, this transgene worked best in a high copy-number array, and not in single-copy.  
781 Furthermore, expression of this transgene is likely to be at least partially dependent upon regulatory  
782 input by MED-1,2, based on studies with an *end-1* promoter lacking MED binding sites (MADURO *et al.*  
783 2015). As an alternative to direct SKN-1 → ELT-2 regulation, there could be one or more non-GATA  
784 regulators between them, analogous to the MED/END cascade. Regardless of how gut specification  
785 occurs outside of the Elegans supergroup, some set of evolutionary events must have set in motion a  
786 breakdown of the ancestral specification mechanism, favoring the evolution and fixation of the SKN-  
787 1/MED/END cascade as the dominant mode of E specification.

#### 788 **EVOLUTIONARY ORIGIN OF THE SKN-1 → MED → END-1,3 CASCADE**

789 The co-occurrence of the MED and END factors suggests that these genes evolved within a short time at  
790 the base of the Elegans supergroup (Fig. 11A). At the start of this work there was an expectation that  
791 there might have been one or more "transitional" species with only the *end-3* and *end-1* factors, or only

792 one *end*-like factor, for example. Since no such species were found, it may be that a transitional species  
793 has not yet been sequenced, or that the orthologues are highly diverged. The reduced number of  
794 recognizable GATA factors in species outside of the *Elegans* supergroup argues against this possibility,  
795 however.

796 The data strongly suggest that the *med* and *end* genes might have been derived from the same ancestral  
797 gene. This hypothesis is supported by the existence of an intron in the zinc finger domain of all *med* and  
798 *end* genes, except for the *Elegans* group *med* genes where loss of this intron occurred. In the genus,  
799 intron loss is common, and occurs more frequently than intron gain (ROY and PENNY 2006). One  
800 mechanism by which this particular intron could have been lost is through germline gene conversion  
801 from a reverse-transcribed (spliced) mRNA (ROY and GILBERT 2005). An alternative mechanism could be  
802 through microhomology-mediated end joining, or MMEJ, of a double-stranded break in the gene (MCVEY  
803 and LEE 2008; VAN SCHENDEL and TIJSTERMAN 2013). Indeed, in one of the *C. japonica med* genes, a short  
804 stretch of six base pairs upstream of this intron recurs close to the 3' splice site of the intron itself, such  
805 that a repair of a double-stranded chromosome break by MMEJ would result in an in-frame removal of  
806 the intron (Fig. 11B). This would also require that the asparagine codon (AAC) is somehow maintained,  
807 which may be possible given the observed types of MMEJ repair of double-stranded breaks induced by  
808 Cas9 cleavage, e.g. (TAHERI-GHAHFAROKHI *et al.* 2018). Regardless of the mechanism, loss of this intron  
809 likely occurred only once in the last common ancestor to the *Elegans* group. I note in passing that the  
810 converse property, lack of intron gain in the *Elegans* group *med* genes, may be accounted for by  
811 selection for rapid gene expression through avoidance of mRNA splicing; most early zygotic *Drosophila*  
812 genes are in fact intronless (GUILGUR *et al.* 2014). However, a small number of the *med* gene predictions  
813 in the *Elegans* supergroup do have introns (Supplemental File S1).

814 The structural conservation among the 20 *Elegans* supergroup MEDs and ENDS lead me to propose a  
815 model by which the MED/END cascade arose through duplication and modification of existing genes,  
816 from *elt-2* upwards, as shown in Fig. 11C. The similarity of the END-3 and END-1 orthologs and their  
817 tendency to be <50 kbp apart in a species suggests that they originated from a common progenitor  
818 together, or that one was a duplicate of the other. Considering the stronger resemblance of the DNA-  
819 binding domain of END-1 with that of ELT-2 and vertebrate cGATA1, a reasonable hypothesis is that *end-1*  
820 originated first, as a duplicate of an ancestral *elt-2* gene that was both activated by SKN-1 and  
821 maintained its own expression through positive autoregulation. Positive autoregulation of ELT-2 is  
822 known and has even been visualized *in vivo* (FUKUSHIGE *et al.* 1999). Duplication of *elt-2* has likely  
823 occurred to generate the extant paralogous (and likely inactive) *C. elegans elt-4* gene, and more  
824 significantly, *C. elegans elt-7*, a paralogue of *elt-2* that shares overlapping function, expression and  
825 autoregulation with *elt-2* (FUKUSHIGE *et al.* 2003; SOMMERMANN *et al.* 2010). Although not necessary at  
826 this step, if the SKN-1 sites in the *elt-2* promoter became degenerate, the *end-1* prototype would be  
827 stable. A paralogous *end-3* prototype gene might then have originated as a simple linked duplication of  
828 *end-1*. Lending support for *elt-2* as a progenitor for the *end* genes is the presence of the conserved zinc  
829 finger intron found in all *end-1/3* orthologues and in *C. elegans elt-2/7*. The two *end* genes could be  
830 stabilized by the complete loss of SKN-1 sites in the *elt-2* promoter, degeneracy of SKN-1 sites in the

831 *end-1* promoter, and coevolution of END-3 with binding sites in the *end-1* promoter. In this state, *end-1*  
832 acts to amplify input into *elt-2* from *end-3*.

833 A challenge is in accounting for the origin of a *med*-like progenitor, given the evidence that they form a  
834 structurally divergent set of regulators. In this work it was found that while the *Elegans* group species  
835 have intronless *med* genes, obscuring their origin, the putative Japonica group *meds* share a common  
836 intron in the zinc finger coding region that is in the same location as the aforementioned intron in all  
837 extant *end-3* and *end-1* genes. This leads to the hypothesis that a prototype *med* gene arose as a  
838 duplicate of one of these genes, the most logical of which may be *end-3*. Co-evolution of the MED DNA-  
839 binding domain with cognate sites in *end-1* and *end-3* would reduce autoregulation of the *end* genes  
840 and fix the MED factor within the network, though END-3 could retain the ability to contribute to *end-1*  
841 activation. Degeneration of the SKN-1 sites in *end-3* would strengthen the feed-forward cascade. Further  
842 refinement of the network would strengthen regulatory input of the *meds* by SKN-1, activation of *end-3*  
843 by the MEDs, and other regulatory inputs into *end-1*. Further selection on the END-1 coding region  
844 might have been enforced by protein-protein interactions with other factors that contribute to gut  
845 specification.

846 Although this model is highly speculative, there is supporting evidence from evolution of the *Bicoid* (*Bcd*)  
847 gene in an ancestor to cyclorrhaphan flies, a group that includes *Drosophila* (DRIEVER and NUSSLEIN-  
848 VOLHARD 1989; STAUBER *et al.* 1999). *Bcd* specifies anterior fates in early cyclorrhaphan embryos, while  
849 outside of this group *bcd* is not found, and other factors play an analogous role (LYNCH *et al.* 2006;  
850 MCGREGOR 2005). *Bcd* arose as a duplicate of the Hox gene *Zen*, and likely acquired derived DNA-binding  
851 characteristics primarily through two missense mutations in the DNA-binding domain (LIU *et al.* 2018;  
852 MCGREGOR 2005). From studies in the flour beetle *Tribolium*, which lacks *bcd*, it is hypothesized that *Bcd*  
853 took over functions of some of its downstream gap gene targets, which it then became an activator of  
854 (MCGREGOR 2005). *Bcd* is proposed to have originated ~140 Mya at the base of the Cyclorrhapha, a  
855 longer time period than the estimated tens of millions of years since the common ancestor to the  
856 *Elegans* supergroup (COGLAN and WOLFE 2002; CUTTER 2008; WIEGMANN *et al.* 2011). Recruitment of *Bcd*  
857 into A/P specification in *Drosophila* likely required more steps than the MED/END cascade, because from  
858 the proposed model, the cascade originated through duplication and modification of a factors already in  
859 an ancestral version of the network. Hence, it is plausible that emergence of the MED/END network  
860 could have occurred at the base of the *Elegans* supergroup. Furthermore, in analogy to *Bcd*, the initial  
861 evolution of the MED DBD that resulted in a change in its binding site to a non-GATA target site might  
862 have been driven by a small number (or even just one) key amino acid change. With the sequences of  
863 *med* genes from 20 species, such structure-function correlations can now be examined.

864 Studies on the evolution of *Bcd* suggest a possible explanation as to why a more layered gene cascade  
865 might have evolved for embryonic gut specification within the *Elegans* supergroup. The emergence of  
866 *Bcd* may have conferred a more rapid specification of segment identity, allowing developmental time to  
867 become faster without sacrificing robustness (MCGREGOR 2005). By extension to the *Elegans* supergroup,  
868 it is possible that the SKN-1 → MED → END-1,3 gene regulatory cascade coincided with an increase in  
869 developmental speed in *Caenorhabditis*, perhaps as part of the transition to very early and rapid cell fate  
870 specification (LAUGSCH and SCHIERENBERG 2004; SCHIERENBERG 2001). Elucidation of gut specification

871 mechanisms in *Caenorhabditis* species outside of the *Elegans* supergroup, compared with their  
872 developmental speed, could provide evidence for this hypothesis, or alternatively identify non-GATA  
873 factors that play the same role as the MED/END cascade.

874 In the meanwhile, the identification of MED, END-3 and END-1 orthologues in 20 species sets the stage  
875 for studies to test hypotheses about evolution of gene regulatory networks, structure-function  
876 correlations in the evolution of novel DNA-binding domains, and features of developmental system drift.  
877 As the study of gene regulatory networks becomes more computational, the set of MED and END  
878 orthologues identified here will provide a basis for future studies integrating gene network architecture  
879 with transcriptomics data, for example (NOMOTO *et al.* 2019; OMRANIAN and NIKOLOSKI 2017).

880

## 881 ACKNOWLEDGMENTS

882 I am indebted to Mark Blaxter, Lewis Stephens and colleagues at the *Caenorhabditis* Genomes Project in  
883 Edinburgh for prepublication access to the genome sequences of *Caenorhabditis* species and for advice  
884 during this work. I also thank Eric Haag (University of Maryland, College Park) for helpful advice in  
885 interpretation of search results. Earlier versions of this work were completed under my NSF grant  
886 IOS#1258054. I also thank Christian Turner, former UCR undergraduate supported by NIH Award  
887 T34GM062756 from the National Institute of General Medical Sciences (MARCU-STAR) program to UC  
888 Riverside, for having performed preliminary searches of available *Caenorhabditis* sequences in 2014.

889

## 890 FIGURE LEGENDS

891 **Fig. 1.** Embryonic origin of the E blastomere and simplified diagram of the gene regulatory network for  
892 endomesoderm specification in *C. elegans*. (A) The E cell and its sister cell MS are found ventrally in the  
893 8-cell embryo (approximately 50  $\mu\text{m}$  long). MS generates mesodermal cells including body muscles and  
894 the posterior portion of the pharynx, shown in red on the diagram of the larva (approximately 200  $\mu\text{m}$   
895 long). E generates the 20 cells of the intestine, whose nuclei are shown in green on the larva. (B)  
896 Specification of MS and E fates begins with the same SKN-1 and MED-1,2 factors, but then bifurcates  
897 into an MS pathway that includes the T-box factor TBX-35 and the homeobox factor CEH-51, while  
898 endoderm specification involves activation of END-3 and END-1. These upstream transient factors  
899 ultimately activate ELT-2 (and its paralogue ELT-7) which maintain intestinal fate. Additional input into E  
900 specification occurs by input from TCF/POP-1 and Caudal/PAL-1. All of MED-1,2, END-1,3 and ELT-2,7 are  
901 GATA type transcription factors.

902 **Fig. 2.** Orthologues of the MED, END-3 and END-1 genes among species whose sequences were  
903 searched. Species are shown after the phylogeny in (STEVENS *et al.* 2019) with the Japonica group in light  
904 blue and the *Elegans* group in pink. The species *C. parvicauda*, *C. castelli*, *C. quiockensis*, and *C. virilis*,  
905 which contained no orthologues of the MED and END factors, have been omitted for simplicity. Table  
906 cells are colored by the number of orthologues.



907 **Fig. 3.** Synteny and relative orientation among *med* and *end* genes found on sequence scaffolds. Except  
908 where noted by a number, inter-gene distances are shown relative to the scale bar at the top of each  
909 panel. (A) Patterns of linkage among *end-1* (dark blue) and *end-3* (light blue) orthologues among the  
910 *Elegans* supergroup species. (B) Patterns of linkage among *med* orthologues for a subset of species.

911 **Fig. 4.** *med* and *end* gene structures and conserved promoter motifs. (A) Gene structures. 600bp of  
912 promoter are shown as a line, and the coding DNA sequence (CDS) predictions are shown relative to the  
913 scale bar at the top. Boxes are exons, and spaces joined by a 'V' are introns. Bent arrows indicate the  
914 location of the predicted start codon. An asterisk denotes the intron conserved among all *end* genes and  
915 Japonica group *med* genes. (B) Motifs identified by MEME for the *med* and *end-1,3* genes. The motifs are  
916 symbolized by a colored circle on the promoters in (A). Some of the motifs are shown in their reverse  
917 complement from the MEME output files in Supplemental Files S13 and S14.

918 **Fig. 5.** Phylogenetic tree of representative MED, END-3 and END-1 DNA-binding domains. The DNA-  
919 binding domains of *C. elegans* ELT-2 and chicken GATA1 are shown as outgroups. Each of the three  
920 factors forms a distinct clade, with the END-1 factors showing the highest similarity, followed by END-3,  
921 then the MEDs as the most diverse group.

922 **Fig. 6.** Phylogenetic tree of all MED factors, showing high prevalence of duplications across the *Elegans*  
923 supergroup. In most cases, paralogous duplicates likely arose post-speciation, although there are  
924 examples that suggest that some species each inherited two or three genes from a common ancestor  
925 that later underwent further duplications. The tree was generated by RAxML using the MED DNA-  
926 binding domains (KOZLOV *et al.* 2019; STAMATAKIS 2014).

927 **Fig. 7.** Phylogenetic tree of all END-3 and END-1 factors, showing tendency for END-1 factors to be  
928 unique, and END-3 factors to have undergone some duplications. The tree was generated by RAxML  
929 using the END-3 and END-1 DNA-binding domains (KOZLOV *et al.* 2019; STAMATAKIS 2014).

930 **Fig. 8.** Conserved MED and END protein domains. The top part of the figure shows the MED, END-3 and  
931 END-1 protein structures with conserved domains in colored regions. Triangles represent the positions  
932 of introns in the coding regions as shown in the gene models in Fig. 4A. The bottom of the figure shows  
933 the names of the domains, which are shown at the amino acid level in Figs. 9 and 10. The MED  
934 orthologues have a variable region high in serine and threonine (Poly-S/T), while END-1 and END-3 share  
935 an amino-terminal polyserine domain (Poly-S) of variable length and an Endodermal GATA Domain  
936 (EGD). The END-1 orthologs share three additional regions not found in END-3. The species are arranged  
937 after the phylogeny in (STEVENS *et al.* 2019).

938 **Fig. 9.** DNA-binding domains (DBDs) and additional carboxyl amino acids aligned using MUSCLE (EDGAR  
939 2004). The zinc fingers and basic domains are shown for representative sequences of (A) MED, (B) END-  
940 3, (C) END-1, and (D) a representative subset of all three factors. Consensus sequences are shown below  
941 each alignment. The phylogeny of Stevens *et al.* (2019) is shown to the left of the species names for  
942 reference. Under the consensus sequences, the amino acids that mediate site recognition by the *C.*  
943 *elegans* MED-1 DBD for (A) and cGATA1 for (B), (C) and (D) are shown (LOWRY *et al.* 2009; OMICHINSKI *et*

944 *al.* 1993). Asterisks show corresponding amino acids that are invariant (black) or are generally conserved  
945 (gray).

946 **Fig. 10.** Other conserved domains of unknown significance among the MED and END proteins. (A) A  
947 portion of the alignment of Poly-S/T domains (MED factors) and the Poly-S domains (END-3 and END-1).  
948 Serines are highlighted in blue and threonines in green. (B) Extended Endodermal GATA Domains (EGDs)  
949 immediately upstream of the zinc fingers of END-3 and END-1. A consensus sequence is shown beneath  
950 each alignment, with amino acids similar between END-3 and END-1 shown with an asterisk (\*). (C)  
951 Highly conserved regions among the END-1 factors showing highly conserved amino acids and a  
952 consensus sequence beneath the alignment.

953 **Fig. 11.** Origin of the MED, END-3 and END-1 factors. (A) Origin of all three factors at the base of the  
954 *Elegans* supergroup, followed by loss of a conserved intron in an ancestral *med* gene at the base of the  
955 *Elegans* group. (B) Hypothetical microhomology-mediated end joining (MMEJ) event that could delete  
956 the conserved zinc finger intron at the base of the *Elegans* group, using a 6-bp identity in-frame  
957 microhomology in an extant *C. japonica med* gene. At top, the microhomology is shown for the top  
958 strand. In the bottom part, complementary strands are shown pairing across the microhomology, which  
959 if resolved could result in an in-frame deletion of the intron, after (VAN SCHENDEL and TIJSTERMAN 2013).  
960 This would also require maintenance of the AAC codon for asparagine immediately to the right of the  
961 homology. (C) Speculative model for generation of the SKN-1/MED/END regulatory cascade through  
962 intercalation by serial duplications of an ancestral autoregulating *elt-2* gene. A bent arrow indicates the  
963 transcription start site, with the regulatory activity of the protein product of the gene shown as a  
964 colored line from the bent arrow. The promoter is to the left of the bent arrow. The positions in the  
965 promoters are only meant to qualitatively convey positive regulation and not indicate number or  
966 position of binding sites.

967 **Supplemental File S1.** This Microsoft Excel (.xlsx) file contains all gene predictions, coding regions, and  
968 coordinates of protein domains used to generate Fig. 8.

969 **Supplemental Files S2-S12.** FASTA files containing protein and promoter sequences.

970 **Supplemental Files S13 and S14.** MEME output HTML files.

971 **Supplemental Tables S1, S2 and S3.** These tables contain search results for known *cis*-regulatory sites.

972 REFERENCES

- 973 ALLEN, M. A., L. W. HILLIER, R. H. WATERSTON and T. BLUMENTHAL, 2011 A global analysis of *C. elegans* trans-  
974 splicing. *Genome Res* **21**: 255-264.
- 975 AN, J. H., and T. K. BLACKWELL, 2003 SKN-1 links *C. elegans* mesendodermal specification to a conserved  
976 oxidative stress response. *Genes Dev* **17**: 1882-1893.
- 977 BAILEY, T. L., and C. ELKAN, 1994 Fitting a mixture model by expectation maximization to discover motifs  
978 in biopolymers. *Proc Int Conf Intell Syst Mol Biol* **2**: 28-36.
- 979 BARRIERE, A., S. P. YANG, E. PEKAREK, C. G. THOMAS, E. S. HAAG *et al.*, 2009 Detecting heterozygosity in  
980 shotgun genome assemblies: Lessons from obligately outcrossing nematodes. *Genome Res* **19**:  
981 470-480.
- 982 BAUGH, L. R., A. A. HILL, D. K. SLONIM, E. L. BROWN and C. P. HUNTER, 2003 Composition and dynamics of the  
983 *Caenorhabditis elegans* early embryonic transcriptome. *Development* **130**: 889-900.
- 984 BHAMBHANI, C., A. J. RAVINDRANATH, R. A. MENTINK, M. V. CHANG, M. C. BETIST *et al.*, 2014 Distinct DNA  
985 binding sites contribute to the TCF transcriptional switch in *C. elegans* and *Drosophila*. *PLoS*  
986 *Genet* **10**: e1004133.
- 987 BLACKWELL, T. K., B. BOWERMAN, J. R. PRIESS and H. WEINTRAUB, 1994 Formation of a monomeric DNA  
988 binding domain by Skn-1 bZIP and homeodomain elements. *Science* **266**: 621-628.
- 989 BOECK, M. E., T. BOYLE, Z. BAO, J. MURRAY, B. MERICLE *et al.*, 2011 Specific roles for the GATA transcription  
990 factors end-1 and end-3 during *C. elegans* E-lineage development. *Dev Biol* **358**: 345-355.
- 991 BOWERMAN, B., B. A. EATON and J. R. PRIESS, 1992 *skn-1*, a maternally expressed gene required to specify  
992 the fate of ventral blastomeres in the early *C. elegans* embryo. *Cell* **68**: 1061-1075.
- 993 BROITMAN-MADURO, G., K. T.-H. LIN, W. HUNG and M. MADURO, 2006 Specification of the *C. elegans* MS  
994 blastomere by the T-box factor TBX-35. *Development* **133**: 3097-3106.
- 995 BROITMAN-MADURO, G., M. F. MADURO and J. H. ROTHMAN, 2005 The noncanonical binding site of the MED-  
996 1 GATA factor defines differentially regulated target genes in the *C. elegans* mesendoderm. *Dev*  
997 *Cell* **8**: 427-433.
- 998 CARROLL, A. S., D. E. GILBERT, X. LIU, J. W. CHEUNG, J. E. MICHNOWICZ *et al.*, 1997 SKN-1 domain folding and  
999 basic region monomer stabilization upon DNA binding. *Genes Dev* **11**: 2227-2238.
- 1000 CHOI, H., G. BROITMAN-MADURO and M. F. MADURO, 2017 Partially compromised specification causes  
1001 stochastic effects on gut development in *C. elegans*. *Dev Biol* **427**: 49-60.
- 1002 COGHLAN, A., and K. H. WOLFE, 2002 Fourfold faster rate of genome rearrangement in nematodes than in  
1003 *Drosophila*. *Genome Res* **12**: 857-867.
- 1004 COROIAN, C., G. BROITMAN-MADURO and M. F. MADURO, 2005 Med-type GATA factors and the evolution of  
1005 mesendoderm specification in nematodes. *Dev Biol* **289**: 444-455.
- 1006 COUTHIER, A., J. SMITH, P. MCGARR, B. CRAIG and J. S. GILLEARD, 2004 Ectopic expression of a *Haemonchus*  
1007 *contortus* GATA transcription factor in *Caenorhabditis elegans* reveals conserved function in  
1008 spite of extensive sequence divergence. *Mol Biochem Parasitol* **133**: 241-253.
- 1009 CUTTER, A. D., 2008 Divergence times in *Caenorhabditis* and *Drosophila* inferred from direct estimates of  
1010 the neutral mutation rate. *Mol Biol Evol* **25**: 778-786.
- 1011 CUTTER, A. D., R. H. GARRETT, S. MARK, W. WANG and L. SUN, 2019 Molecular evolution across  
1012 developmental time reveals rapid divergence in early embryogenesis. *Evol Lett* **3**: 359-373.
- 1013 DARNELL, A. M., A. R. SUBRAMANIAM and E. K. O'SHEA, 2018 Translational Control through Differential  
1014 Ribosome Pausing during Amino Acid Limitation in Mammalian Cells. *Mol Cell* **71**: 229-243 e211.
- 1015 DAVIDSON, E. H., 2010 Emerging properties of animal gene regulatory networks. *Nature* **468**: 911-920.
- 1016 DAVIDSON, E. H., J. P. RAST, P. OLIVERI, A. RANSICK, C. CALESTANI *et al.*, 2002 A provisional regulatory gene  
1017 network for specification of endomesoderm in the sea urchin embryo. *Dev Biol* **246**: 162-190.

- 1018 DIETERICH, C., S. W. CLIFTON, L. N. SCHUSTER, A. CHINWALLA, K. DELEHAUNTY *et al.*, 2008 The *Pristionchus*  
1019 *pacificus* genome provides a unique perspective on nematode lifestyle and parasitism. *Nat*  
1020 *Genet* **40**: 1193-1198.
- 1021 DINEEN, A., E. OSBORNE NISHIMURA, B. GOSZCZYNSKI, J. H. ROTHMAN and J. D. MCGHEE, 2018 Quantitating  
1022 transcription factor redundancy: The relative roles of the ELT-2 and ELT-7 GATA factors in the *C.*  
1023 *elegans* endoderm. *Dev Biol* **435**: 150-161.
- 1024 DRIEVER, W., and C. NUSSLEIN-VOLHARD, 1989 The bicoid protein is a positive regulator of hunchback  
1025 transcription in the early *Drosophila* embryo. *Nature* **337**: 138-143.
- 1026 DU, L., S. TRACY and S. A. RIFKIN, 2016 Mutagenesis of GATA motifs controlling the endoderm regulator  
1027 *elt-2* reveals distinct dominant and secondary cis-regulatory elements. *Dev Biol* **412**: 160-170.
- 1028 EDGAR, R. C., 2004 MUSCLE: multiple sequence alignment with high accuracy and high throughput.  
1029 *Nucleic Acids Res* **32**: 1792-1797.
- 1030 ELLIS, R. E., and S. Y. LIN, 2014 The evolutionary origins and consequences of self-fertility in nematodes.  
1031 *F1000Prime Rep* **6**: 62.
- 1032 ETHEVE, L., J. MARTIN and R. LAVERY, 2016 Dynamics and recognition within a protein-DNA complex: a  
1033 molecular dynamics study of the SKN-1/DNA interaction. *Nucleic Acids Res* **44**: 1440-1448.
- 1034 FELIX, M. A., 2007 Cryptic quantitative evolution of the vulva intercellular signaling network in  
1035 *Caenorhabditis*. *Curr Biol* **17**: 103-114.
- 1036 FELIX, M. A., C. BRAENDLE and A. D. CUTTER, 2014 A streamlined system for species diagnosis in  
1037 *Caenorhabditis* (Nematoda: Rhabditidae) with name designations for 15 distinct biological  
1038 species. *PLoS One* **9**: e94723.
- 1039 FROKJAER-JENSEN, C., N. JAIN, L. HANSEN, M. W. DAVIS, Y. LI *et al.*, 2016 An Abundant Class of Non-coding  
1040 DNA Can Prevent Stochastic Gene Silencing in the *C. elegans* Germline. *Cell* **166**: 343-357.
- 1041 FUKUSHIGE, T., B. GOSZCZYNSKI, H. TIAN and J. D. MCGHEE, 2003 The Evolutionary Duplication and Probable  
1042 Demise of an Endodermal GATA Factor in *Caenorhabditis elegans*. *Genetics* **165**: 575-588.
- 1043 FUKUSHIGE, T., M. G. HAWKINS and J. D. MCGHEE, 1998 The GATA-factor *elt-2* is essential for formation of  
1044 the *Caenorhabditis elegans* intestine. *Dev Biol* **198**: 286-302.
- 1045 FUKUSHIGE, T., M. J. HENDZEL, D. P. BAZETT-JONES and J. D. MCGHEE, 1999 Direct visualization of the *elt-2*  
1046 gut-specific GATA factor binding to a target promoter inside the living *Caenorhabditis elegans*  
1047 embryo. *Proc Natl Acad Sci U S A* **96**: 11883-11888.
- 1048 GAUDET, J., S. MUTTUMU, M. HORNER and S. E. MANGO, 2004 Whole-genome analysis of temporal gene  
1049 expression during foregut development. *PLoS Biol* **2**: e352.
- 1050 GILLIS, W. Q., B. A. BOWERMAN and S. Q. SCHNEIDER, 2008 The evolution of protostome GATA factors:  
1051 molecular phylogenetics, synteny, and intron/exon structure reveal orthologous relationships.  
1052 *BMC Evol Biol* **8**: 112.
- 1053 GILLIS, W. Q., J. ST JOHN, B. BOWERMAN and S. Q. SCHNEIDER, 2009 Whole genome duplications and  
1054 expansion of the vertebrate GATA transcription factor gene family. *BMC Evol Biol* **9**: 207.
- 1055 GRISHKEVICH, V., T. HASHIMSHONY and I. YANAI, 2011 Core promoter T-blocks correlate with gene expression  
1056 levels in *C. elegans*. *Genome Res* **21**: 707-717.
- 1057 GUILGUR, L. G., P. PRUDENCIO, D. SOBRAL, D. LISZEKOVA, A. ROSA *et al.*, 2014 Requirement for highly efficient  
1058 pre-mRNA splicing during *Drosophila* early embryonic development. *Elife* **3**: e02181.
- 1059 HAAG, E. S., D. H. A. FITCH and M. DELATTRE, 2018 From "the Worm" to "the Worms" and Back Again: The  
1060 Evolutionary Developmental Biology of Nematodes. *Genetics* **210**: 397-433.
- 1061 HAAG, E. S., and C. G. THOMAS, 2015 Fundamentals of Comparative Genome Analysis in *Caenorhabditis*  
1062 *Nematodes*. *Methods Mol Biol* **1327**: 11-21.
- 1063 HAO, Y., Z. HU, D. SIEBURTH and J. M. KAPLAN, 2012 RIC-7 promotes neuropeptide secretion. *PLoS Genet* **8**:  
1064 e1002464.

- 1065 HOUTHOOFD, W., K. JACOBSEN, C. MERTENS, S. VANGESTEL, A. COOMANS *et al.*, 2003 Embryonic cell lineage of  
1066 the marine nematode *Pellioiditis marina*. *Dev Biol* **258**: 57-69.
- 1067 HUNTER, C. P., and C. KENYON, 1996 Spatial and temporal controls target *pal-1* blastomere-specification  
1068 activity to a single blastomere lineage in *C. elegans* embryos. *Cell* **87**: 217-226.
- 1069 KANEKO, H., E. KOBAYASHI, M. YAMAMOTO and R. SHIMIZU, 2012 N- and C-terminal transactivation domains  
1070 of GATA1 protein coordinate hematopoietic program. *J Biol Chem* **287**: 21439-21449.
- 1071 KENT, W. J., and A. M. ZAHLER, 2000 Conservation, regulation, synteny, and introns in a large-scale *C.*  
1072 *briggsae*-*C. elegans* genomic alignment. *Genome Res* **10**: 1115-1125.
- 1073 KIONTKE, K. C., M. A. FELIX, M. AILION, M. V. ROCKMAN, C. BRAENDLE *et al.*, 2011 A phylogeny and molecular  
1074 barcodes for *Caenorhabditis*, with numerous new species from rotting fruits. *BMC Evol Biol* **11**:  
1075 339.
- 1076 KONRAD, A., S. FLIBOTTE, J. TAYLOR, R. H. WATERSTON, D. G. MOERMAN *et al.*, 2018 Mutational and  
1077 transcriptional landscape of spontaneous gene duplications and deletions in *Caenorhabditis*  
1078 *elegans*. *Proc Natl Acad Sci U S A* **115**: 7386-7391.
- 1079 KOREN, Z., and E. N. TRIFONOV, 2011 Role of everlasting triplet expansions in protein evolution. *J Mol Evol*  
1080 **72**: 232-239.
- 1081 KORF, I., P. FLICEK, D. DUAN and M. R. BRENT, 2001 Integrating genomic homology into gene structure  
1082 prediction. *Bioinformatics* **17 Suppl 1**: S140-148.
- 1083 KOZLOV, A. M., D. DARRIBA, T. FLOURI, B. MOREL and A. STAMATAKIS, 2019 RAXML-NG: A fast, scalable, and  
1084 user-friendly tool for maximum likelihood phylogenetic inference. *Bioinformatics*.
- 1085 KUMAR, S., G. STECHER, M. LI, C. KNYAZ and K. TAMURA, 2018 MEGA X: Molecular Evolutionary Genetics  
1086 Analysis across Computing Platforms. *Mol Biol Evol* **35**: 1547-1549.
- 1087 LAMBERT, S. A., A. W. H. YANG, A. SASSE, G. COWLEY, M. ALBU *et al.*, 2019 Similarity regression predicts  
1088 evolution of transcription factor sequence specificity. *Nat Genet* **51**: 981-989.
- 1089 LAUGSCH, M., and E. SCHIERENBERG, 2004 Differences in maternal supply and early development of closely  
1090 related nematode species. *Int J Dev Biol* **48**: 655-662.
- 1091 LEVIN, M., T. HASHIMSHONY, F. WAGNER and I. YANAI, 2012 Developmental milestones punctuate gene  
1092 expression in the *Caenorhabditis* embryo. *Dev Cell* **22**: 1101-1108.
- 1093 LIN, K. T., G. BROITMAN-MADURO, W. W. HUNG, S. CERVANTES and M. F. MADURO, 2009 Knockdown of *SKN-1*  
1094 and the Wnt effector *TCF/POP-1* reveals differences in endomesoderm specification in *C.*  
1095 *briggsae* as compared with *C. elegans*. *Dev Biol* **325**: 296-306.
- 1096 LIN, R., S. THOMPSON and J. R. PRIESS, 1995 *pop-1* encodes an HMG box protein required for the  
1097 specification of a mesoderm precursor in early *C. elegans* embryos. *Cell* **83**: 599-609.
- 1098 LIU, Q., P. ONAL, R. R. DATTA, J. M. ROGERS, U. SCHMIDT-OTT *et al.*, 2018 Ancient mechanisms for the  
1099 evolution of the bicoid homeodomain's function in fly development. *Elife* **7**.
- 1100 LO, M. C., S. HA, I. PELCZER, S. PAL and S. WALKER, 1998 The solution structure of the DNA-binding domain  
1101 of *Skn-1*. *Proc Natl Acad Sci U S A* **95**: 8455-8460.
- 1102 LOWRY, J., J. YOCHER, C. H. CHUANG, K. SUGIOKA, A. A. CONNOLLY *et al.*, 2015 High-Throughput Cloning of  
1103 Temperature-Sensitive *Caenorhabditis elegans* Mutants with Adult Syncytial Germline  
1104 Membrane Architecture Defects. *G3 (Bethesda)* **5**: 2241-2255.
- 1105 LOWRY, J. A., and W. R. ATCHLEY, 2000 Molecular evolution of the GATA family of transcription factors:  
1106 conservation within the DNA-binding domain. *J Mol Evol* **50**: 103-115.
- 1107 LOWRY, J. A., R. GAMSJAEGER, S. Y. THONG, W. HUNG, A. H. KWAN *et al.*, 2009 Structural analysis of *MED-1*  
1108 reveals unexpected diversity in the mechanism of DNA recognition by GATA-type zinc finger  
1109 domains. *J Biol Chem* **284**: 5827-5835.
- 1110 LYNCH, J. A., A. E. BRENT, D. S. LEAF, M. A. PULTZ and C. DESPLAN, 2006 Localized maternal orthodenticle  
1111 patterns anterior and posterior in the long germ wasp *Nasonia*. *Nature* **439**: 728-732.

- 1112 MADURO, M., R. J. HILL, P. J. HEID, E. D. NEWMAN-SMITH, J. ZHU *et al.*, 2005a Genetic redundancy in  
1113 endoderm specification within the genus *Caenorhabditis*. *Dev Biol* **284**: 509-522.
- 1114 MADURO, M. F., 2017 Gut Development in *C. elegans*. *Semin Cell Dev Biol*.
- 1115 MADURO, M. F., G. BROITMAN-MADURO, H. CHOI, F. CARRANZA, A. CHIA-YI WU *et al.*, 2015 MED GATA factors  
1116 promote robust development of the *C. elegans* endoderm. *Dev Biol* **404**: 66-79.
- 1117 MADURO, M. F., G. BROITMAN-MADURO, I. MENGARELLI and J. H. ROTHMAN, 2007 Maternal deployment of the  
1118 embryonic SKN-1-->MED-1,2 cell specification pathway in *C. elegans*. *Dev Biol* **301**: 590-601.
- 1119 MADURO, M. F., J. J. KASMIR, J. ZHU and J. H. ROTHMAN, 2005b The Wnt effector POP-1 and the PAL-  
1120 1/Caudal homeoprotein collaborate with SKN-1 to activate *C. elegans* endoderm development.  
1121 *Dev Biol* **285**: 510-523.
- 1122 MADURO, M. F., R. LIN and J. H. ROTHMAN, 2002 Dynamics of a developmental switch: recursive  
1123 intracellular and intranuclear redistribution of *Caenorhabditis elegans* POP-1 parallels Wnt-  
1124 inhibited transcriptional repression. *Dev Biol* **248**: 128-142.
- 1125 MADURO, M. F., M. D. MENEGHINI, B. BOWERMAN, G. BROITMAN-MADURO and J. H. ROTHMAN, 2001 Restriction  
1126 of mesendoderm to a single blastomere by the combined action of SKN-1 and a GSK-3beta  
1127 homolog is mediated by MED-1 and -2 in *C. elegans*. *Mol Cell* **7**: 475-485.
- 1128 MATHÉLIER, A., X. ZHAO, A. W. ZHANG, F. PARCY, R. WORSLEY-HUNT *et al.*, 2014 JASPAR 2014: an extensively  
1129 expanded and updated open-access database of transcription factor binding profiles. *Nucleic  
1130 Acids Res* **42**: D142-147.
- 1131 MCGHEE, J. D., T. FUKUSHIGE, M. W. KRAUSE, S. E. MINNEMA, B. GOSZCZYNSKI *et al.*, 2009 ELT-2 is the  
1132 predominant transcription factor controlling differentiation and function of the *C. elegans*  
1133 intestine, from embryo to adult. *Dev Biol* **327**: 551-565.
- 1134 MCGREGOR, A. P., 2005 How to get ahead: the origin, evolution and function of bicoid. *Bioessays* **27**: 904-  
1135 913.
- 1136 MCVEY, M., and S. E. LEE, 2008 MMEJ repair of double-strand breaks (director's cut): deleted sequences  
1137 and alternative endings. *Trends Genet* **24**: 529-538.
- 1138 MEMAR, N., S. SCHIEMANN, C. HENNIG, D. FINDEIS, B. CONRADT *et al.*, 2019 Twenty million years of evolution:  
1139 The embryogenesis of four *Caenorhabditis* species are indistinguishable despite extensive  
1140 genome divergence. *Dev Biol* **447**: 182-199.
- 1141 NOMOTO, Y., Y. KUBOTA, Y. OHNISHI, K. KASAHARA, A. TOMITA *et al.*, 2019 Gene Cascade Finder: A tool for  
1142 identification of gene cascades and its application in *Caenorhabditis elegans*. *PLoS One* **14**:  
1143 e0215187.
- 1144 OMICHINSKI, J. G., G. M. CLORE, O. SCHAAD, G. FELSENFELD, C. TRAINOR *et al.*, 1993 NMR structure of a specific  
1145 DNA complex of Zn-containing DNA binding domain of GATA-1. *Science* **261**: 438-446.
- 1146 OMRANIAN, N., and Z. NIKOLOSKI, 2017 Computational Approaches to Study Gene Regulatory Networks.  
1147 *Methods Mol Biol* **1629**: 283-295.
- 1148 OWRAGHI, M., G. BROITMAN-MADURO, T. LUU, H. ROBERSON and M. F. MADURO, 2010 Roles of the Wnt  
1149 effector POP-1/TCF in the *C. elegans* endomesoderm specification gene network. *Dev Biol* **340**:  
1150 209-221.
- 1151 PAL, S., M. C. LO, D. SCHMIDT, I. PELCZER, S. THURBER *et al.*, 1997 Skn-1: evidence for a bipartite recognition  
1152 helix in DNA binding. *Proc Natl Acad Sci U S A* **94**: 5556-5561.
- 1153 PETER, I. S., and E. H. DAVIDSON, 2016 Implications of Developmental Gene Regulatory Networks Inside  
1154 and Outside Developmental Biology. *Curr Top Dev Biol* **117**: 237-251.
- 1155 RAJ, A., S. A. RIFKIN, E. ANDERSEN and A. VAN OUDENAARDEN, 2010 Variability in gene expression underlies  
1156 incomplete penetrance. *Nature* **463**: 913-918.
- 1157 ROBERTSON, S. M., M. C. LO, R. ODOM, X. D. YANG, J. MEDINA *et al.*, 2011 Functional analyses of vertebrate  
1158 TCF proteins in *C. elegans* embryos. *Dev Biol* **355**: 115-123.

- 1159 ROCHELEAU, C. E., W. D. DOWNS, R. LIN, C. WITTMANN, Y. BEI *et al.*, 1997 Wnt signaling and an APC-related  
1160 gene specify endoderm in early *C. elegans* embryos. *Cell* **90**: 707-716.
- 1161 ROY, S. W., and W. GILBERT, 2005 The pattern of intron loss. *Proc Natl Acad Sci U S A* **102**: 713-718.
- 1162 ROY, S. W., and D. PENNY, 2006 Smoke without fire: most reported cases of intron gain in nematodes  
1163 instead reflect intron losses. *Mol Biol Evol* **23**: 2259-2262.
- 1164 SAWICKA, K., M. BUSHELL, K. A. SPRIGGS and A. E. WILLIS, 2008 Polypyrimidine-tract-binding protein: a  
1165 multifunctional RNA-binding protein. *Biochem Soc Trans* **36**: 641-647.
- 1166 SAWYER, J. M., S. GLASS, T. LI, G. SHEMER, N. D. WHITE *et al.*, 2011 Overcoming redundancy: an RNAi  
1167 enhancer screen for morphogenesis genes in *Caenorhabditis elegans*. *Genetics* **188**: 549-564.
- 1168 SCHIERENBERG, E., 2001 Three sons of fortune: early embryogenesis, evolution and ecology of nematodes.  
1169 *Bioessays* **23**: 841-847.
- 1170 SCHIERENBERG, E., 2006 Embryological variation during nematode development. *WormBook*: 1-13.
- 1171 SCHIFFER, P. H., N. A. NSAH, H. GROTEHUSMANN, M. KROIHER, C. LOER *et al.*, 2014 Developmental variations  
1172 among Panagrolaimid nematodes indicate developmental system drift within a small taxonomic  
1173 unit. *Dev Genes Evol* **224**: 183-188.
- 1174 SCHULZE, J., and E. SCHIERENBERG, 2011 Evolution of embryonic development in nematodes. *Evodevo* **2**: 18.
- 1175 SHETTY, P., M. C. LO, S. M. ROBERTSON and R. LIN, 2005 *C. elegans* TCF protein, POP-1, converts from  
1176 repressor to activator as a result of Wnt-induced lowering of nuclear levels. *Dev Biol* **285**: 584-  
1177 592.
- 1178 SIEPEL, A., G. BEJERANO, J. S. PEDERSEN, A. S. HINRICHS, M. HOU *et al.*, 2005 Evolutionarily conserved  
1179 elements in vertebrate, insect, worm, and yeast genomes. *Genome Res* **15**: 1034-1050.
- 1180 SOMMERMANN, E. M., K. R. STROHMAIER, M. F. MADURO and J. H. ROTHMAN, 2010 Endoderm development in  
1181 *Caenorhabditis elegans*: the synergistic action of ELT-2 and -7 mediates the specification--  
1182 >differentiation transition. *Dev Biol* **347**: 154-166.
- 1183 SPIETH, J., D. LAWSON, P. DAVIS, G. WILLIAMS and K. HOWE, 2014 Overview of gene structure in *C. elegans*.  
1184 *WormBook*: 1-18.
- 1185 STAMATAKIS, A., 2014 RAXML version 8: a tool for phylogenetic analysis and post-analysis of large  
1186 phylogenies. *Bioinformatics* **30**: 1312-1313.
- 1187 STAUBER, M., H. JACKLE and U. SCHMIDT-OTT, 1999 The anterior determinant bicoid of *Drosophila* is a  
1188 derived Hox class 3 gene. *Proc Natl Acad Sci U S A* **96**: 3786-3789.
- 1189 STEIN, L. D., Z. BAO, D. BLASIAR, T. BLUMENTHAL, M. R. BRENT *et al.*, 2003 The Genome Sequence of  
1190 *Caenorhabditis briggsae*: A Platform for Comparative Genomics. *PLoS Biol* **1**: E45.
- 1191 STEVENS, L., M. A. FELIX, T. BELTRAN, C. BRAENDLE, C. CAURCEL *et al.*, 2019 Comparative genomics of 10 new  
1192 *Caenorhabditis* species. *Evol Lett* **3**: 217-236.
- 1193 SULLIVAN-BROWN, J. L., P. TANDON, K. E. BIRD, D. J. DICKINSON, S. C. TINTORI *et al.*, 2016 Identifying Regulators  
1194 of Morphogenesis Common to Vertebrate Neural Tube Closure and *Caenorhabditis elegans*  
1195 Gastrulation. *Genetics* **202**: 123-139.
- 1196 SULSTON, J. E., E. SCHIERENBERG, J. G. WHITE and J. N. THOMSON, 1983 The embryonic cell lineage of the  
1197 nematode *Caenorhabditis elegans*. *Dev Biol* **100**: 64-119.
- 1198 TAHERI-GHAHFAROKHI, A., B. J. M. TAYLOR, R. NITSCH, A. LUNDIN, A. L. CAVALLO *et al.*, 2018 Decoding non-  
1199 random mutational signatures at Cas9 targeted sites. *Nucleic Acids Res* **46**: 8417-8434.
- 1200 THORPE, C. J., A. SCHLESINGER, J. C. CARTER and B. BOWERMAN, 1997 Wnt signaling polarizes an early *C.*  
1201 *elegans* blastomere to distinguish endoderm from mesoderm. *Cell* **90**: 695-705.
- 1202 TORRES CLEUREN, Y. N., C. K. EWE, K. C. CHIPMAN, E. R. MEARS, C. G. WOOD *et al.*, 2019 Extensive intraspecies  
1203 cryptic variation in an ancient embryonic gene regulatory network. *Elife* **8**.
- 1204 TRUE, J. R., and E. S. HAAG, 2001 Developmental system drift and flexibility in evolutionary trajectories.  
1205 *Evol Dev* **3**: 109-119.

- 1206 VAN SCHENDEL, R., and M. TIJSTERMAN, 2013 Microhomology-mediated intron loss during metazoan  
1207 evolution. *Genome Biol Evol* **5**: 1212-1219.
- 1208 WALTHER, R. F., E. ATLAS, A. CARRIGAN, Y. ROULEAU, A. EDGEcombe *et al.*, 2005 A serine/threonine-rich motif  
1209 is one of three nuclear localization signals that determine unidirectional transport of the  
1210 mineralocorticoid receptor to the nucleus. *J Biol Chem* **280**: 17549-17561.
- 1211 WEIRAUCH, M. T., A. YANG, M. ALBU, A. G. COTE, A. MONTENEGRO-MONTERO *et al.*, 2014 Determination and  
1212 inference of eukaryotic transcription factor sequence specificity. *Cell* **158**: 1431-1443.
- 1213 WIEGMANN, B. M., M. D. TRAUTWEIN, I. S. WINKLER, N. B. BARR, J. W. KIM *et al.*, 2011 Episodic radiations in  
1214 the fly tree of life. *Proc Natl Acad Sci U S A* **108**: 5690-5695.
- 1215 WIESENFAHRT, T., J. Y. BERG, E. O. NISHIMURA, A. G. ROBINSON, B. GOSZCZYNSKI *et al.*, 2015 The Function and  
1216 Regulation of the GATA Factor *ELT-2* in the *C. elegans* Endoderm. *Development*.
- 1217 WITZE, E. S., E. D. FIELD, D. F. HUNT and J. H. ROTHMAN, 2009 *C. elegans* *pur alpha*, an activator of *end-1*,  
1218 synergizes with the Wnt pathway to specify endoderm. *Dev Biol* **327**: 12-23.
- 1219 WOODRUFF, G. C., O. EKE, S. E. BAIRD, M. A. FELIX and E. S. HAAG, 2010 Insights into species divergence and  
1220 the evolution of hermaphroditism from fertile interspecies hybrids of *Caenorhabditis*  
1221 *nematodes*. *Genetics* **186**: 997-1012.
- 1222 YANG, Z., L. GU, P. H. ROMEO, D. BORIES, H. MOTOHASHI *et al.*, 1994 Human GATA-3 trans-activation, DNA-  
1223 binding, and nuclear localization activities are organized into distinct structural domains. *Mol*  
1224 *Cell Biol* **14**: 2201-2212.
- 1225 YOSHIMURA, J., K. ICHIKAWA, M. J. SHOURA, K. L. ARTILES, I. GABDANK *et al.*, 2019 Recompleting the  
1226 *Caenorhabditis elegans* genome. *Genome Res* **29**: 1009-1022.
- 1227 ZHAO, G., N. IHUEGBU, M. LEE, L. SCHRIEFER, T. WANG *et al.*, 2012 Conserved Motifs and Prediction of  
1228 Regulatory Modules in *Caenorhabditis elegans*. *G3 (Bethesda)* **2**: 469-481.
- 1229 ZHAO, Z., T. J. BOYLE, Z. BAO, J. I. MURRAY, B. MERICLE *et al.*, 2008 Comparative analysis of embryonic cell  
1230 lineage between *Caenorhabditis briggsae* and *Caenorhabditis elegans*. *Dev Biol* **314**: 93-99.
- 1231 ZHAO, Z., S. FLIBOTTE, J. I. MURRAY, D. BLICK, T. J. BOYLE *et al.*, 2010 New tools for investigating the  
1232 comparative biology of *Caenorhabditis briggsae* and *C. elegans*. *Genetics* **184**: 853-863.
- 1233 ZHU, J., T. FUKUSHIGE, J. D. MCGHEE and J. H. ROTHMAN, 1998 Reprogramming of early embryonic  
1234 blastomeres into endodermal progenitors by a *Caenorhabditis elegans* GATA factor. *Genes Dev*  
1235 **12**: 3809-3814.
- 1236 ZHU, J., R. J. HILL, P. J. HEID, M. FUKUYAMA, A. SUGIMOTO *et al.*, 1997 *end-1* encodes an apparent GATA  
1237 factor that specifies the endoderm precursor in *Caenorhabditis elegans* embryos. *Genes Dev* **11**:  
1238 2883-2896.
- 1239
- 1240



Fig. 1

**A**

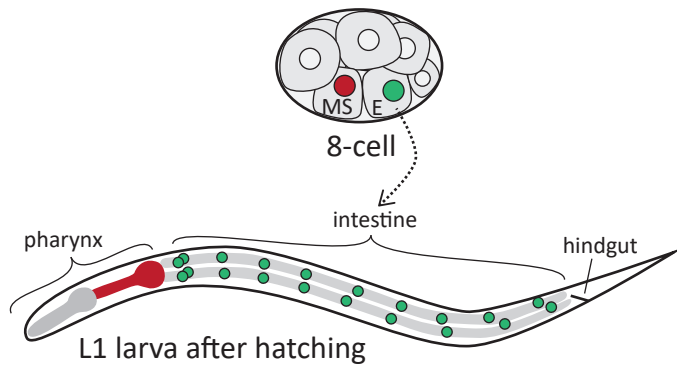

**B**

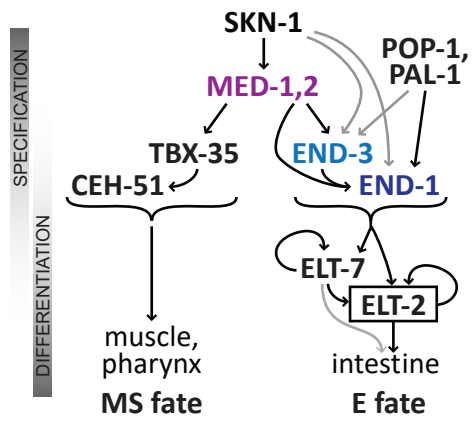



Figure 3

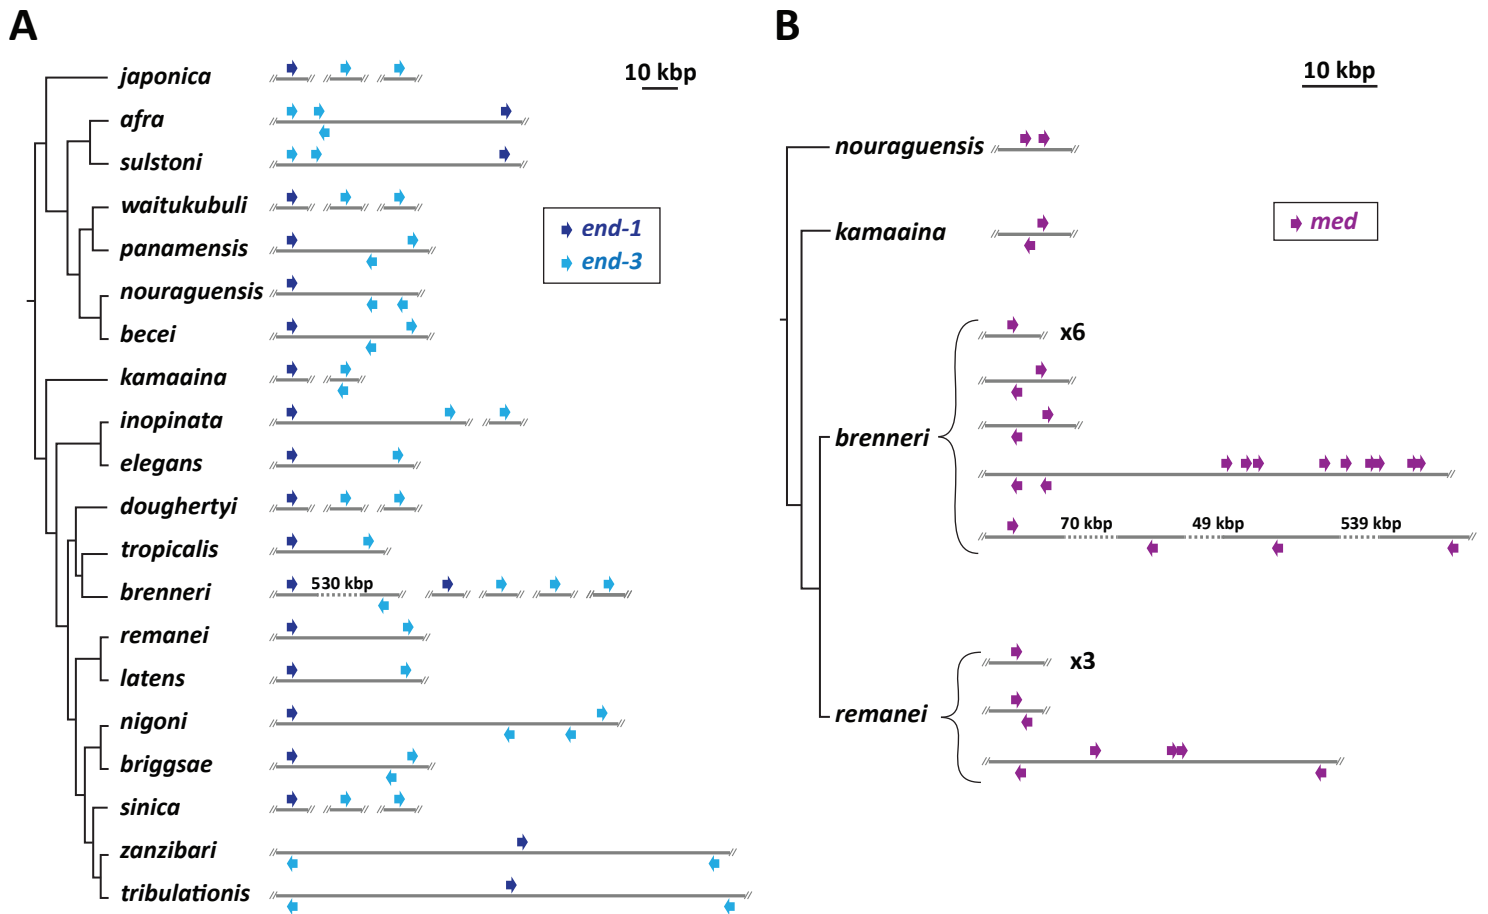

Figure 4

A

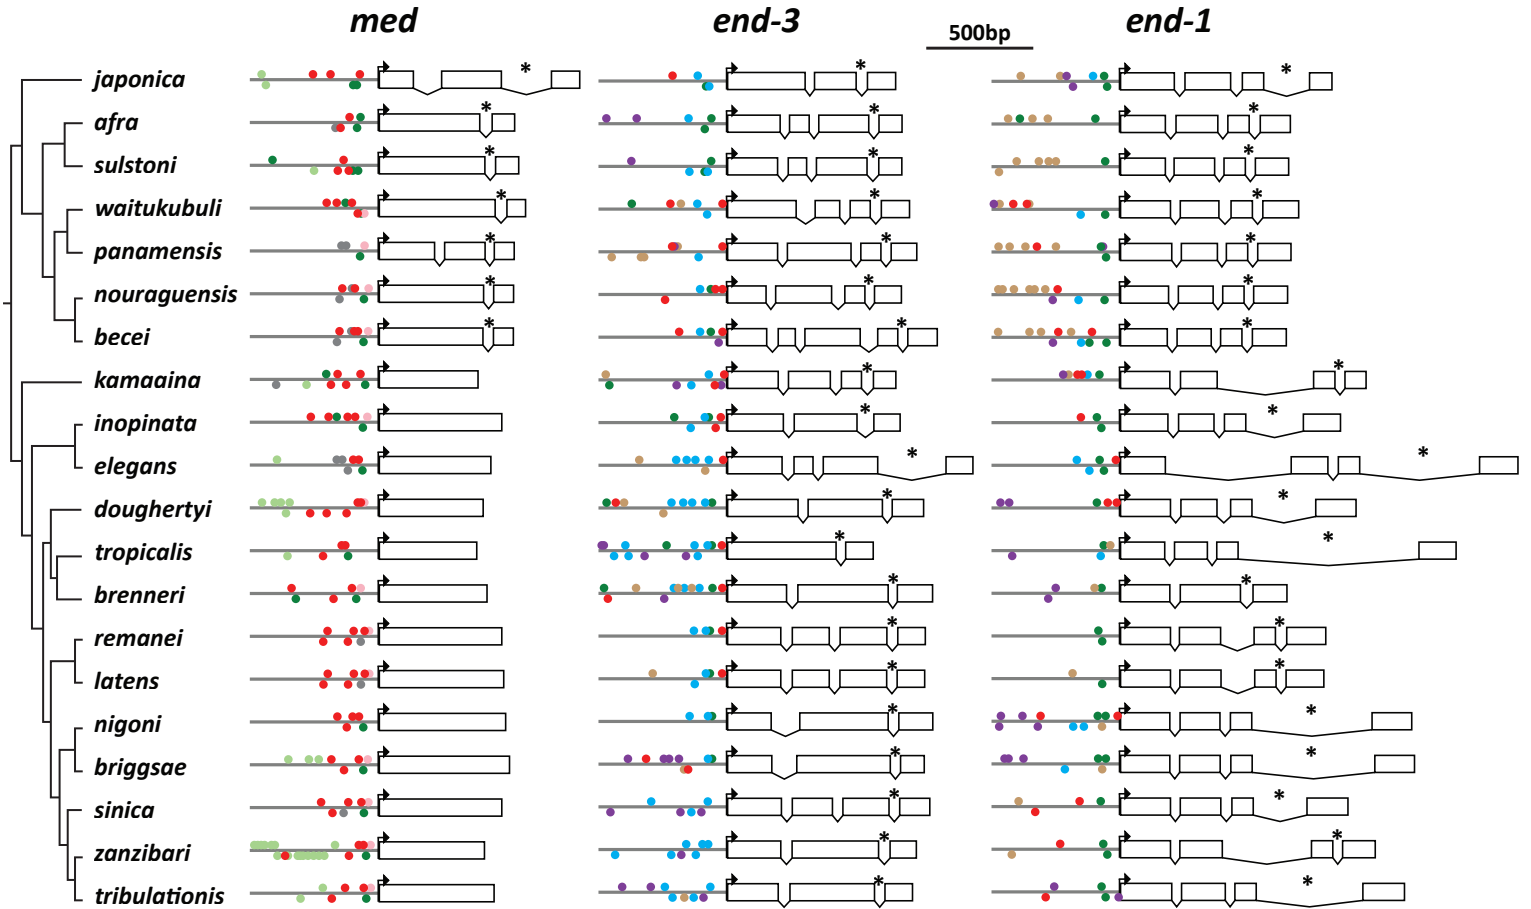

B

| <i>med</i> |      |              |          |                     |               | <i>end-1,3</i> |      |              |          |                     |               |                     |               |
|------------|------|--------------|----------|---------------------|---------------|----------------|------|--------------|----------|---------------------|---------------|---------------------|---------------|
| color      | site | factor/motif | E-value  | # species with site | sites/species | color          | site | factor/motif | E-value  | # species with site | sites/species | # species with site | sites/species |
| ●          |      | SKN-1        | 1.1e-102 | 19/20               | 3.5           | ●              |      | Sp1          | 4.8e-055 | 20/20               | 1.6           | 15/20               | 1.4           |
| ●          |      | Sp1          | 2.0e-033 | 17/20               | 1.5           | ●              |      | MED-1        | 7.8e-053 | 9/20                | 1.2           | 20/20               | 2.6           |
| ●          |      | unknown      | 4.2e-008 | 9/20                | 1.6           | ●              |      | SKN-1        | 2.9e-011 | 12/20               | 1.5           | 14/20               | 1.6           |
| ●          |      | PATC?        | 2.3e-004 | 10/20               | 3.3           | ●              |      | PPY/PPU      | 2.5e-005 | 15/20               | 2.3           | 9/20                | 1.8           |
| ●          |      | TBP          | 1.3e-002 | 13/20               | 1.0           | ●              |      | SL1          | 8.5e-004 | 12/20               | 1.7           | 11/20               | 2.1           |

Figure 5

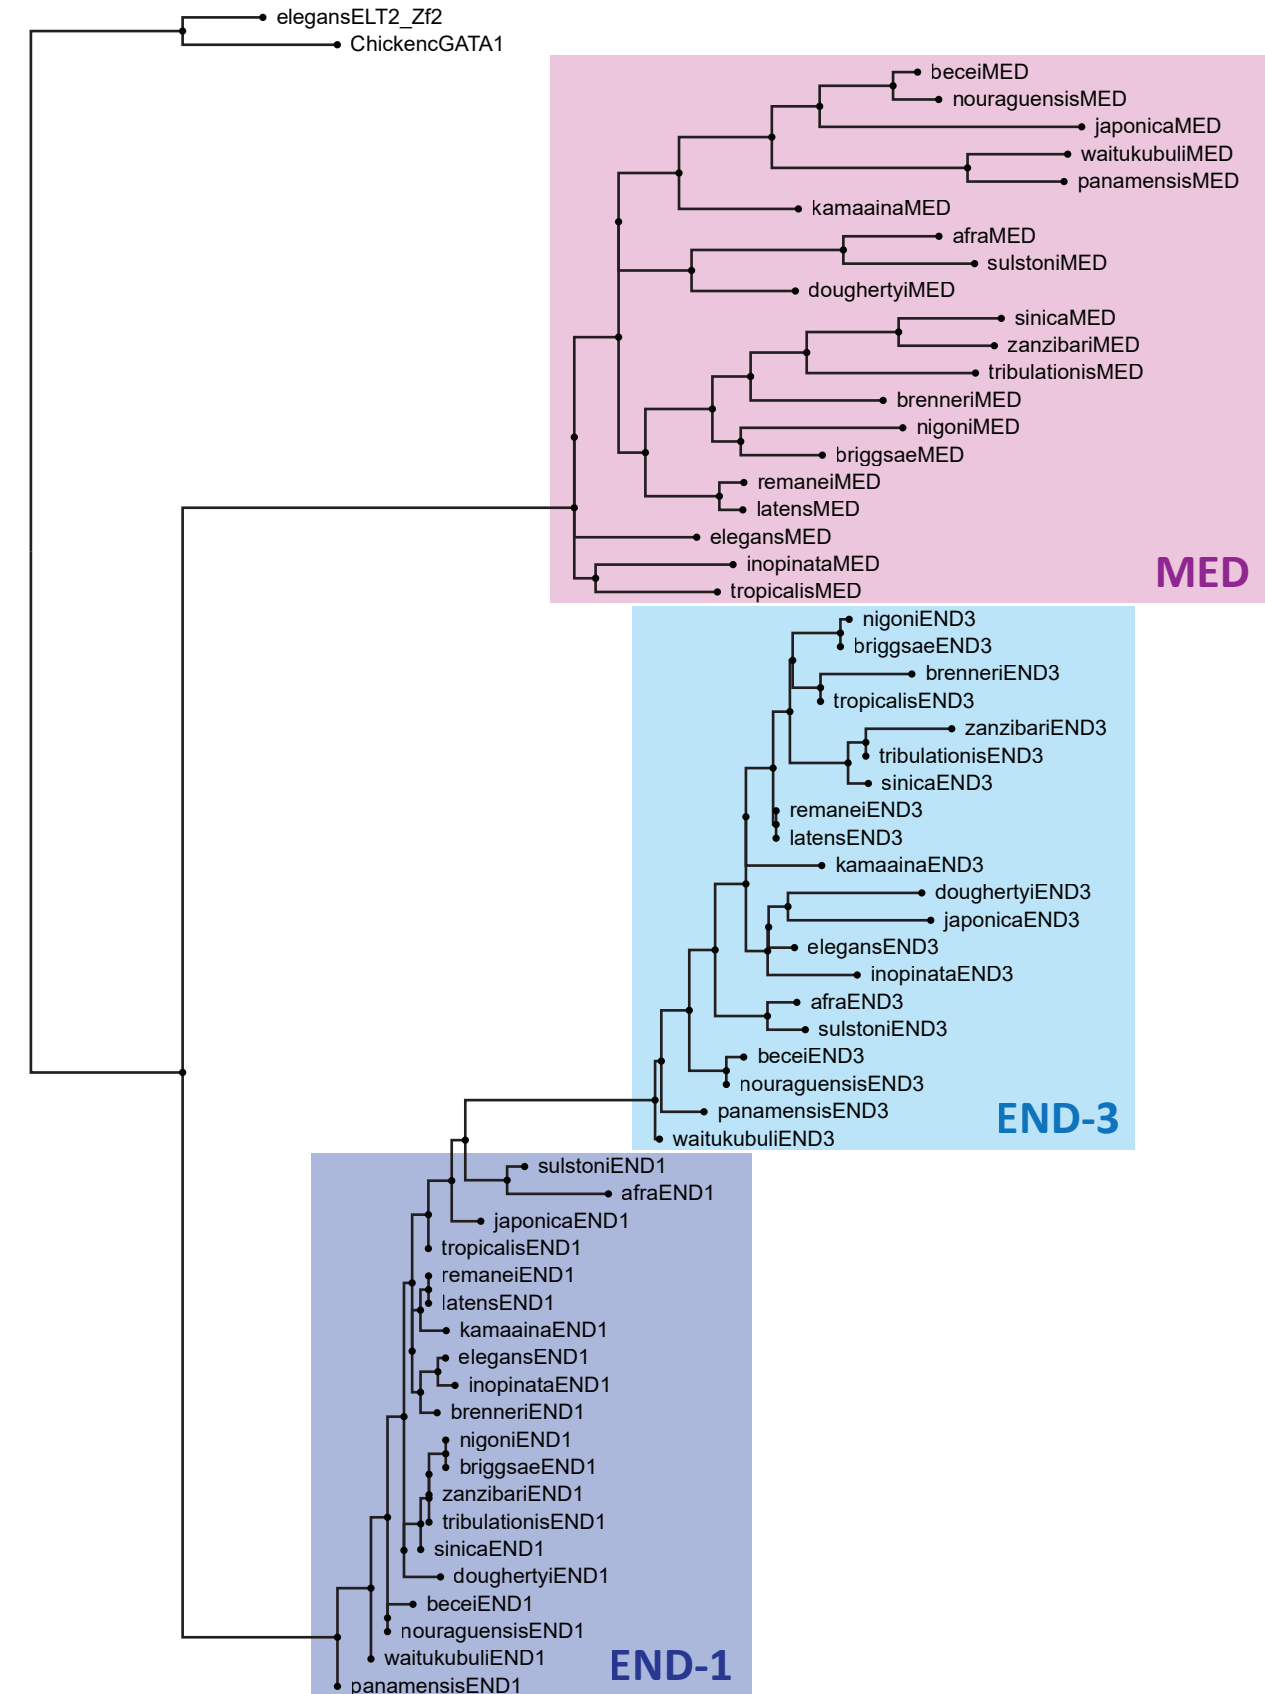

Figure 6

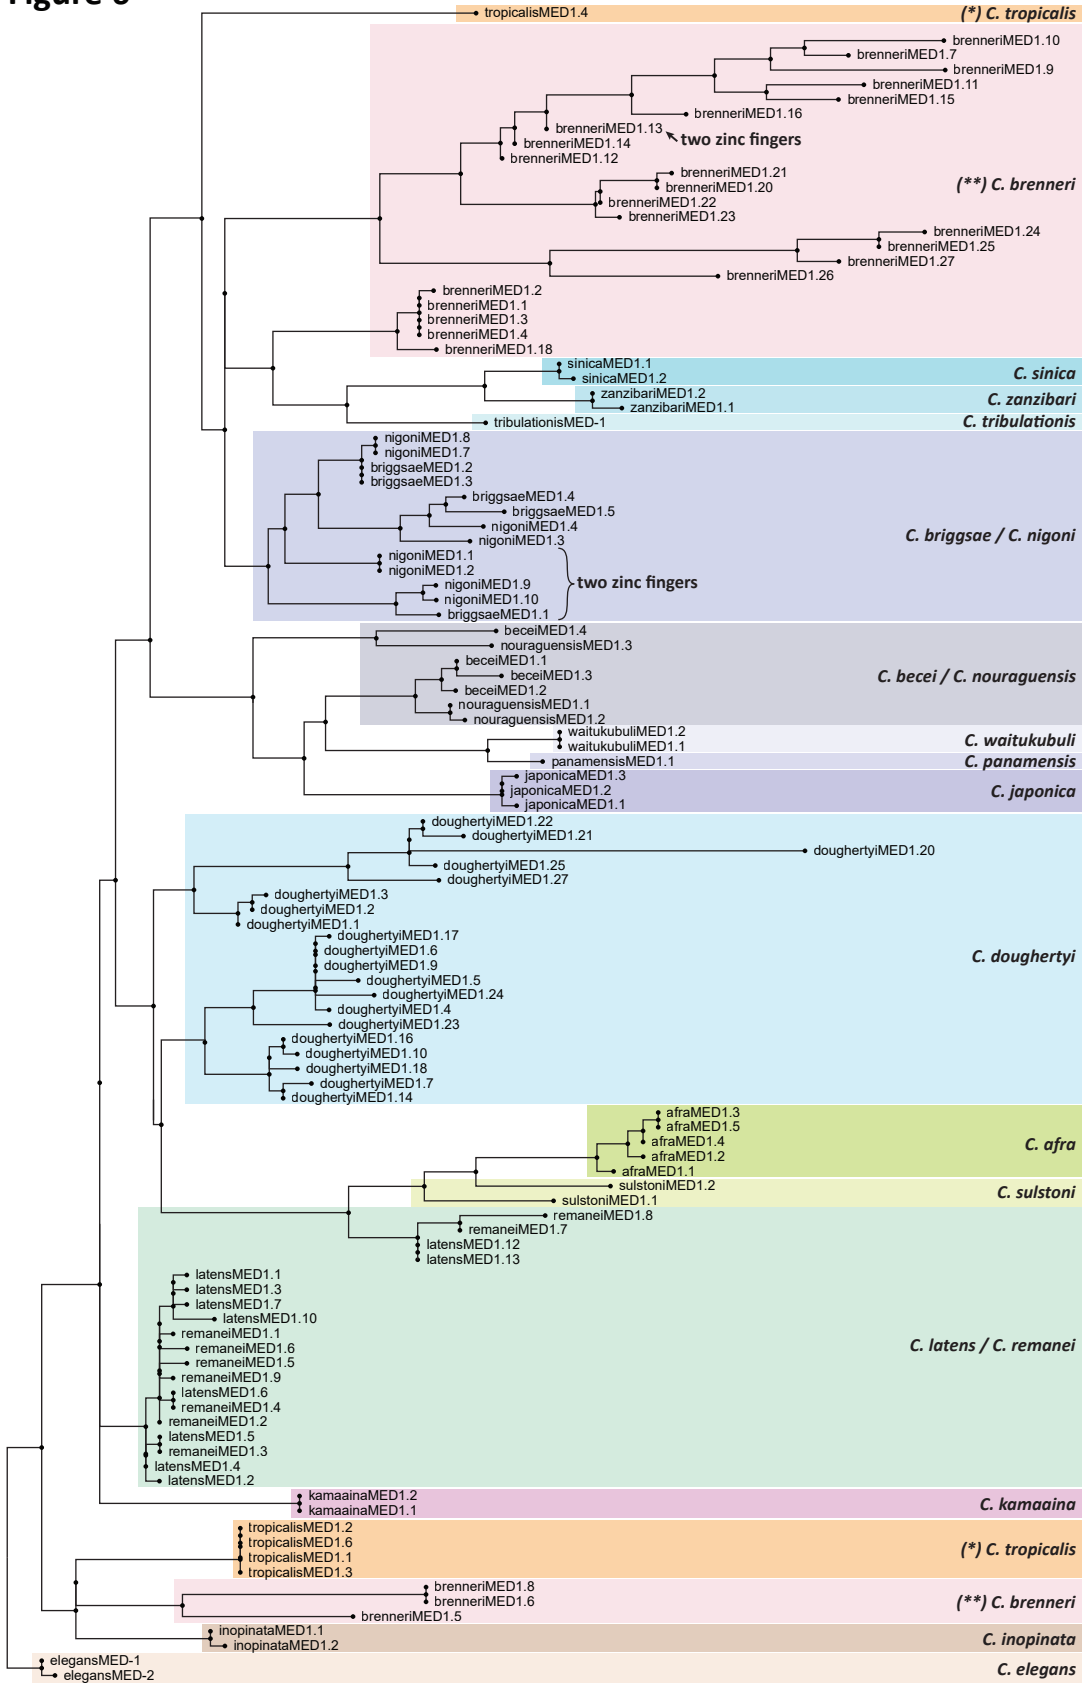

Figure 7

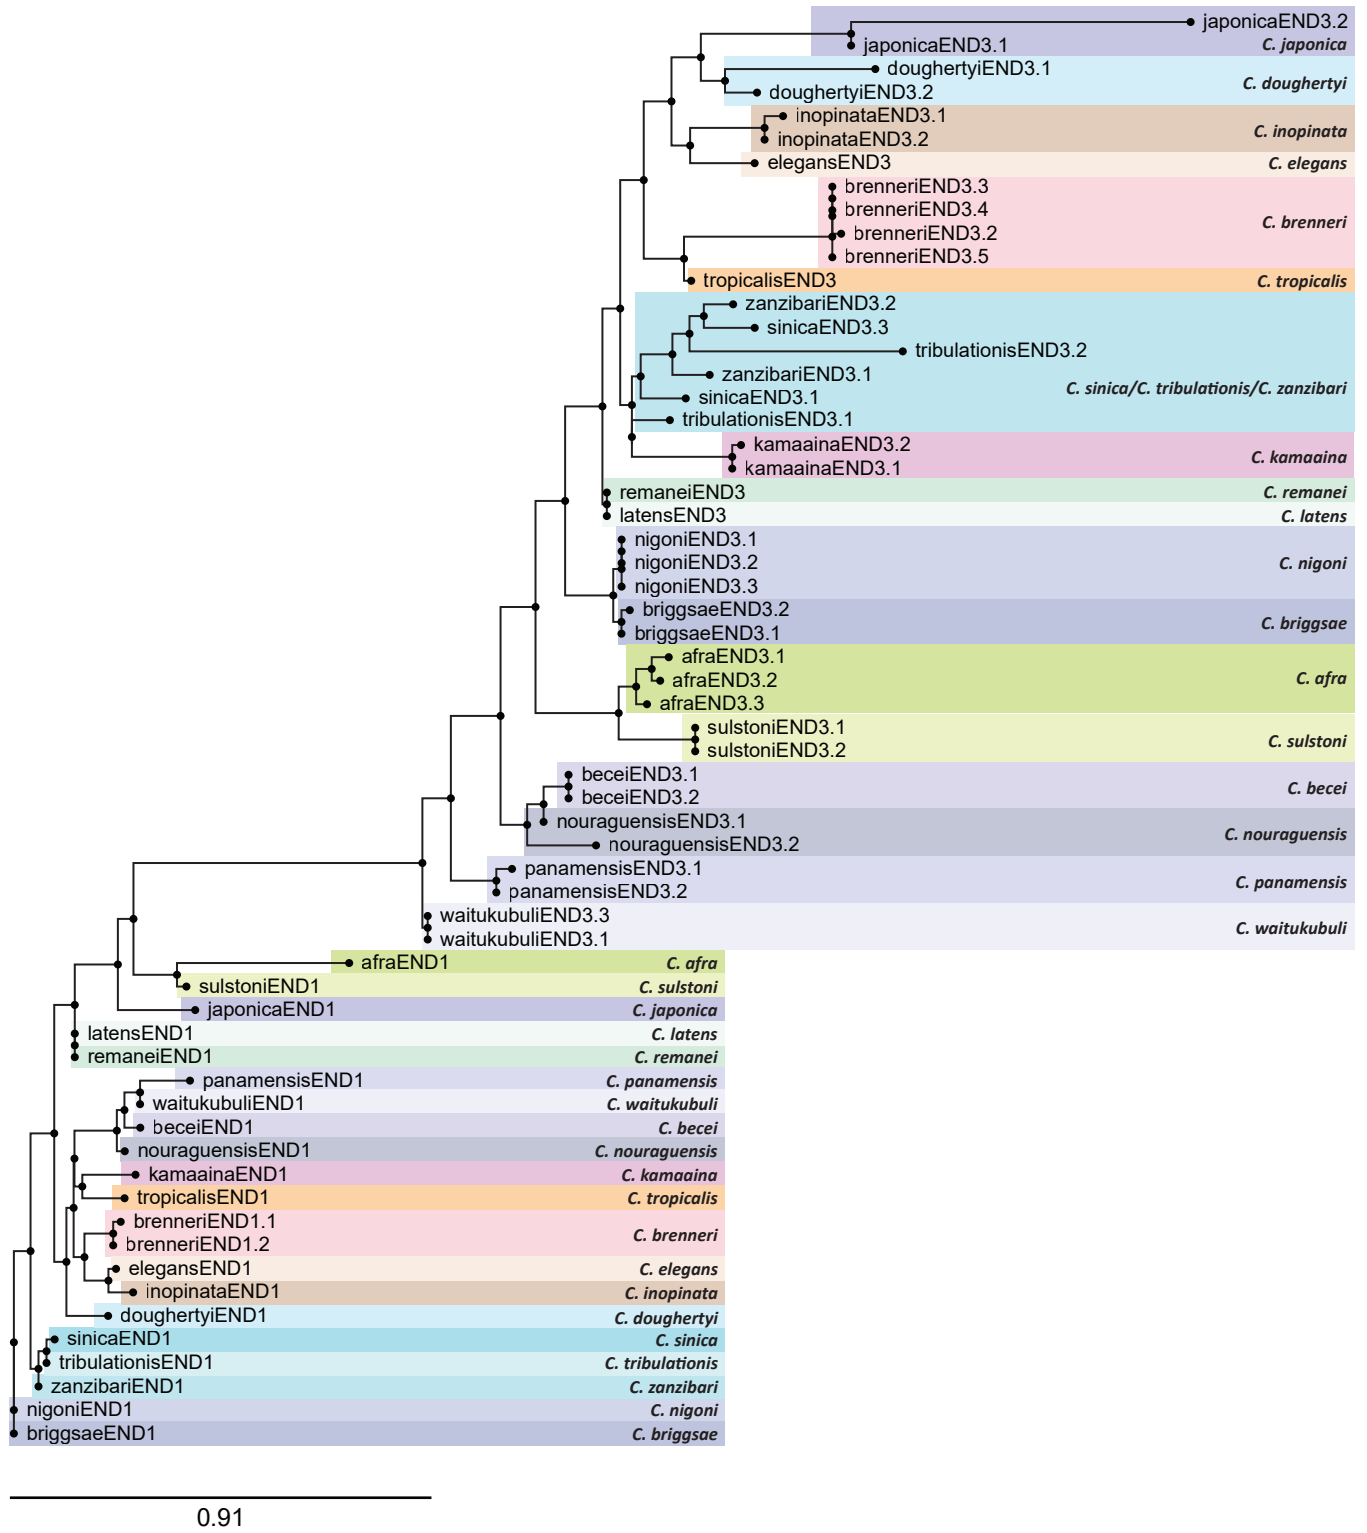

Figure 8

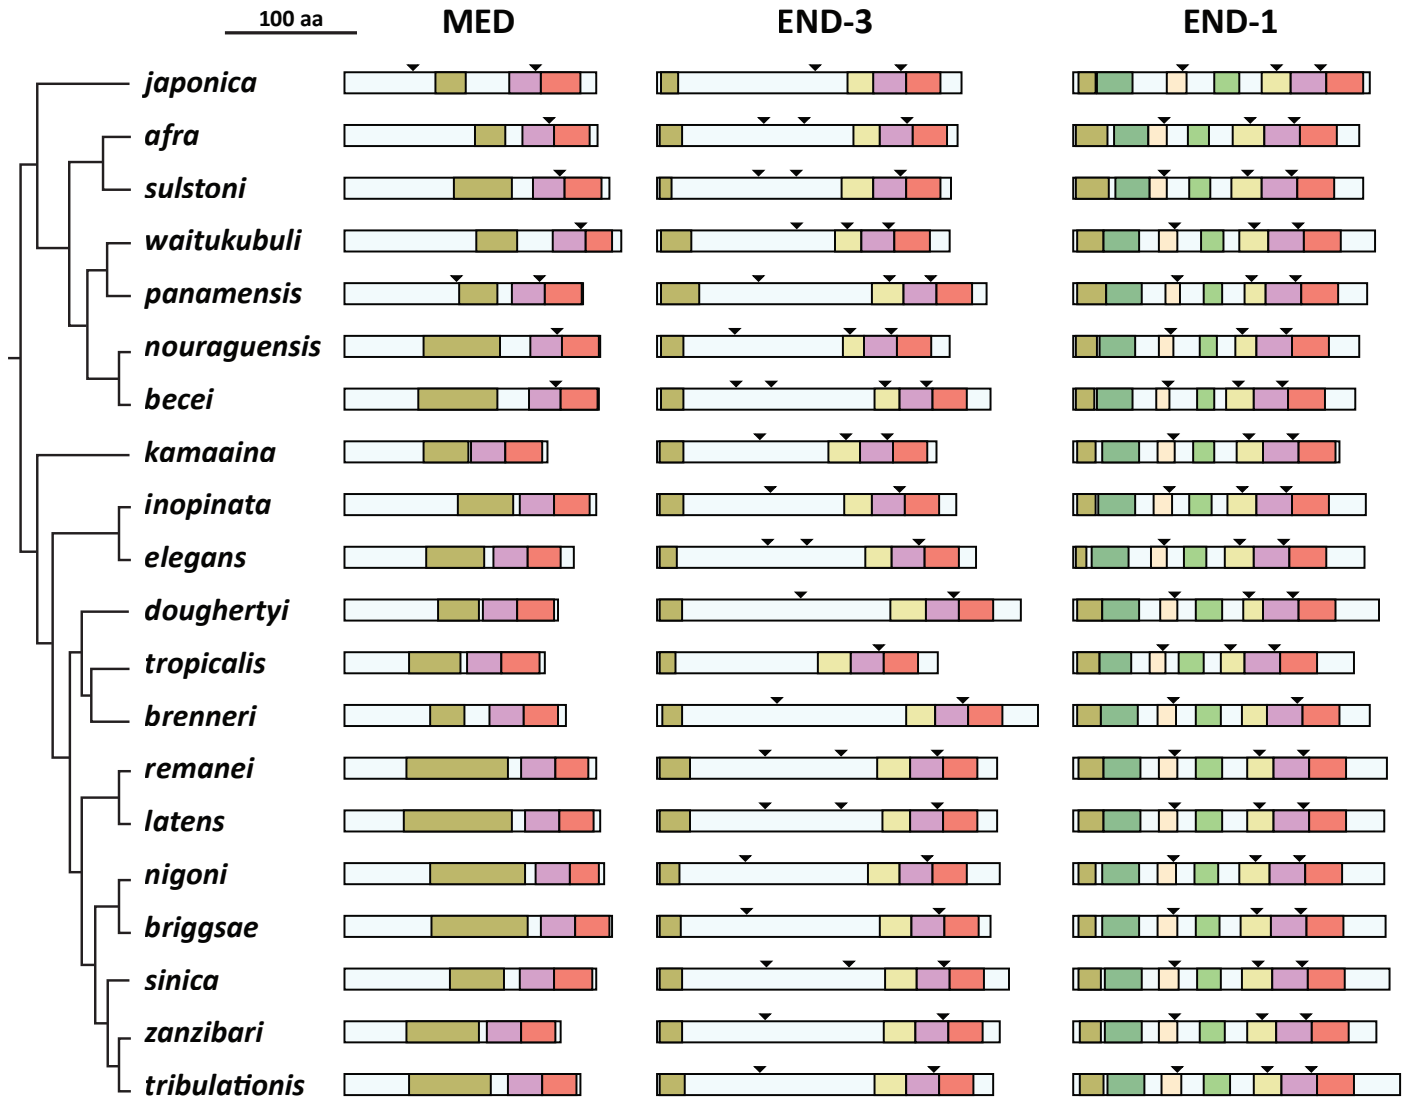

▼ position of introns  
in coding region

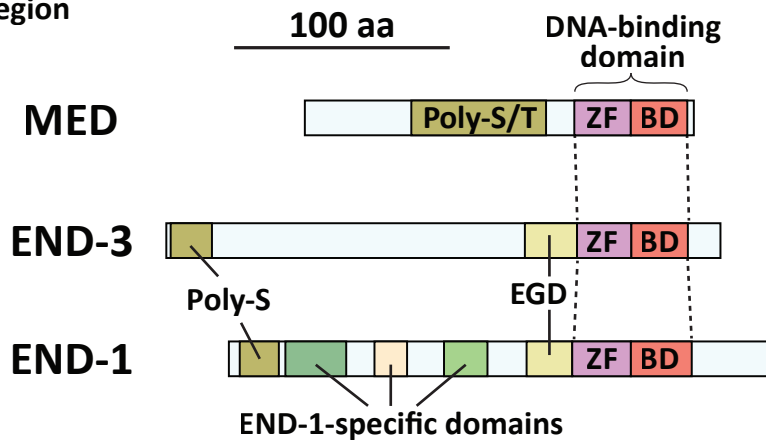



Figure 9

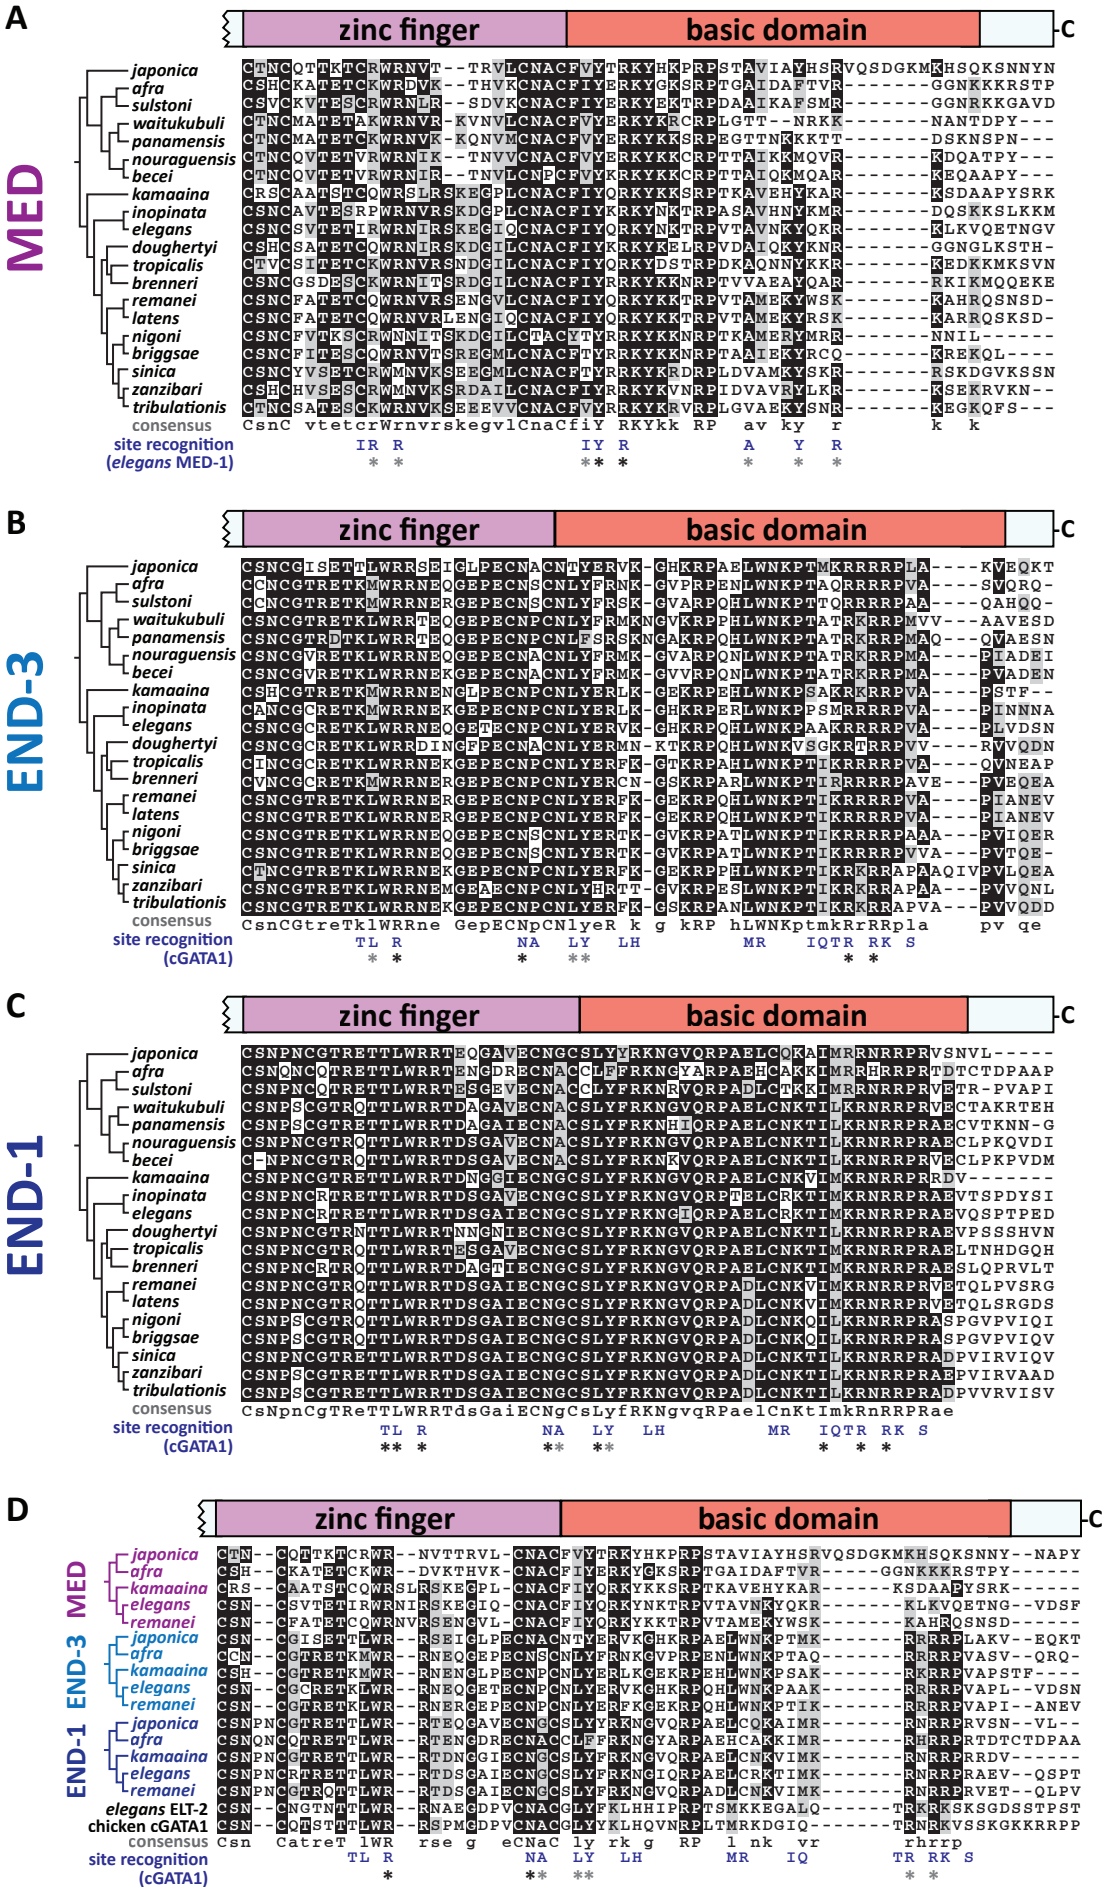

Figure 10

A

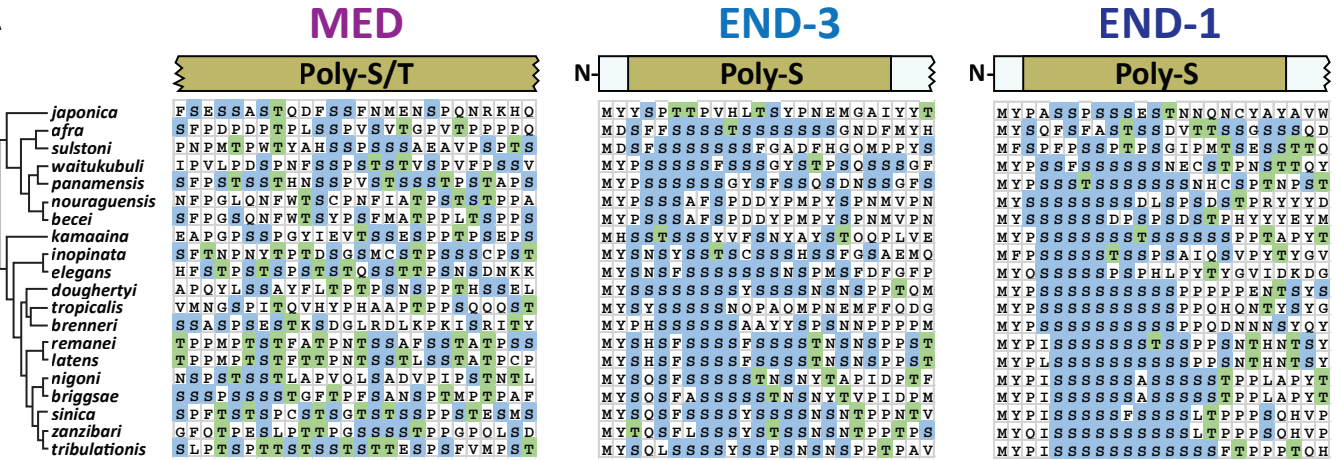

B

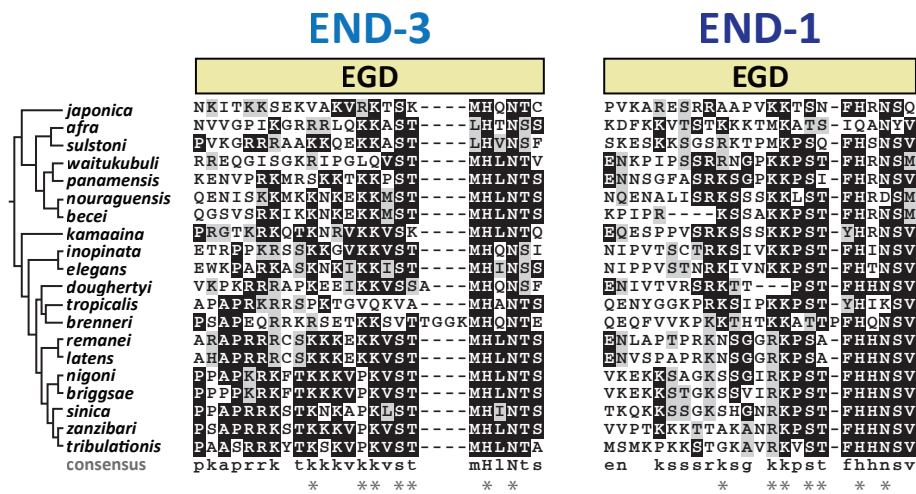

C

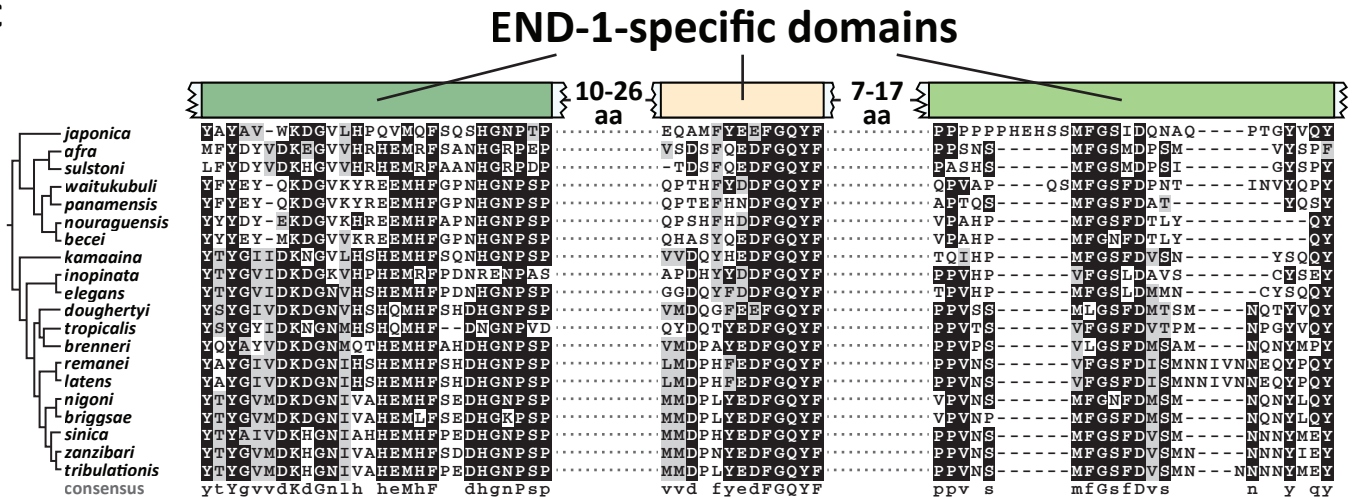

Figure 11

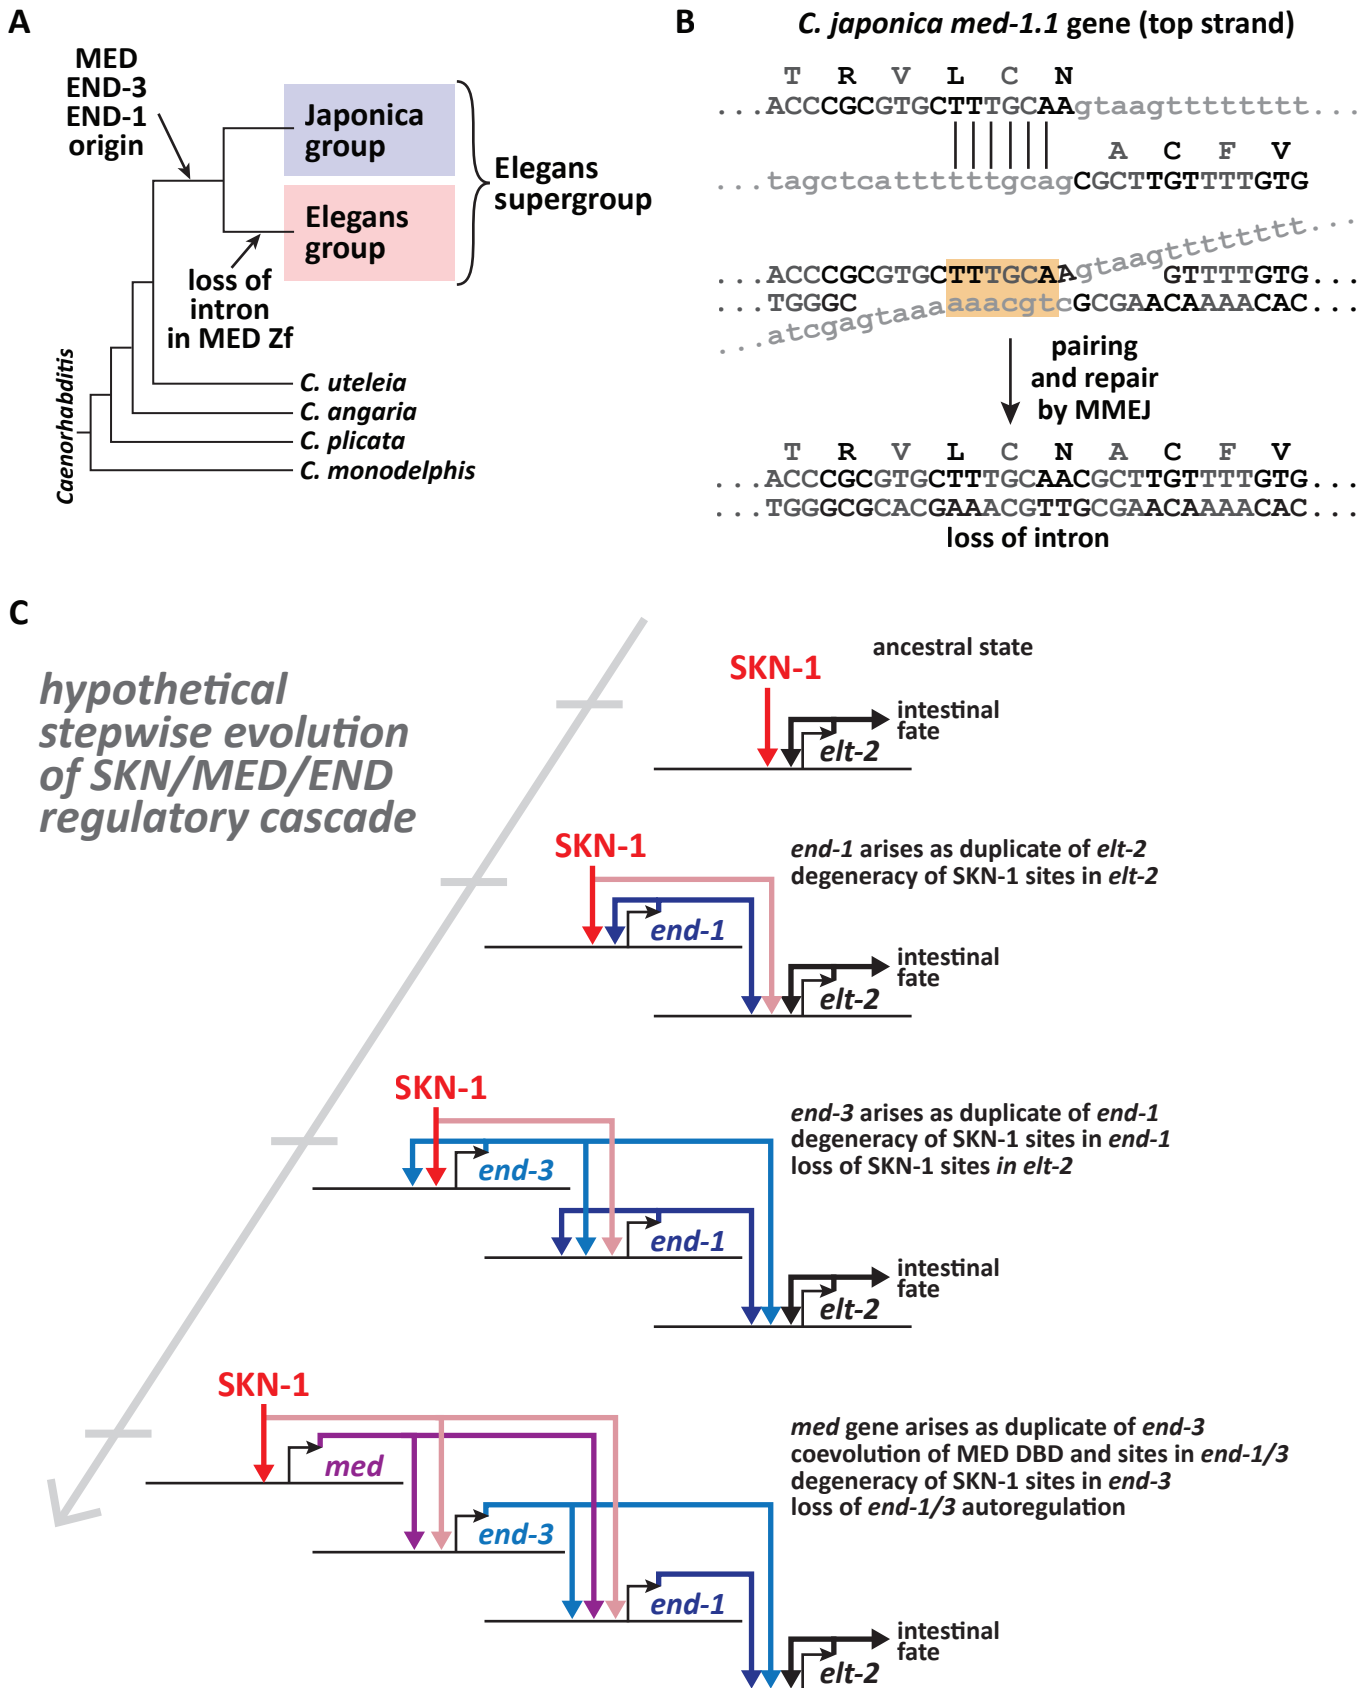

Source: https://www.biorxiv.org/content/10.1101/769760v1.full.pdf
